# Supplementary material for: An extra-erythrocyte role of haemoglobin body in chondrocyte hypoxia adaption
Source: PubMed Central journal article supplement (PMC10600011; doi:10.1038/s41586-023-06611-6), 2023-10-04
Supplement: 41586_2023_6611_MOESM1_ESM.pdf [file 41586_2023_6611_MOESM1_ESM.pdf]

**Supplementary information**

---

**An extra-erythrocyte role of haemoglobin  
body in chondrocyte hypoxia adaption**

---

In the format provided by the  
authors and unedited

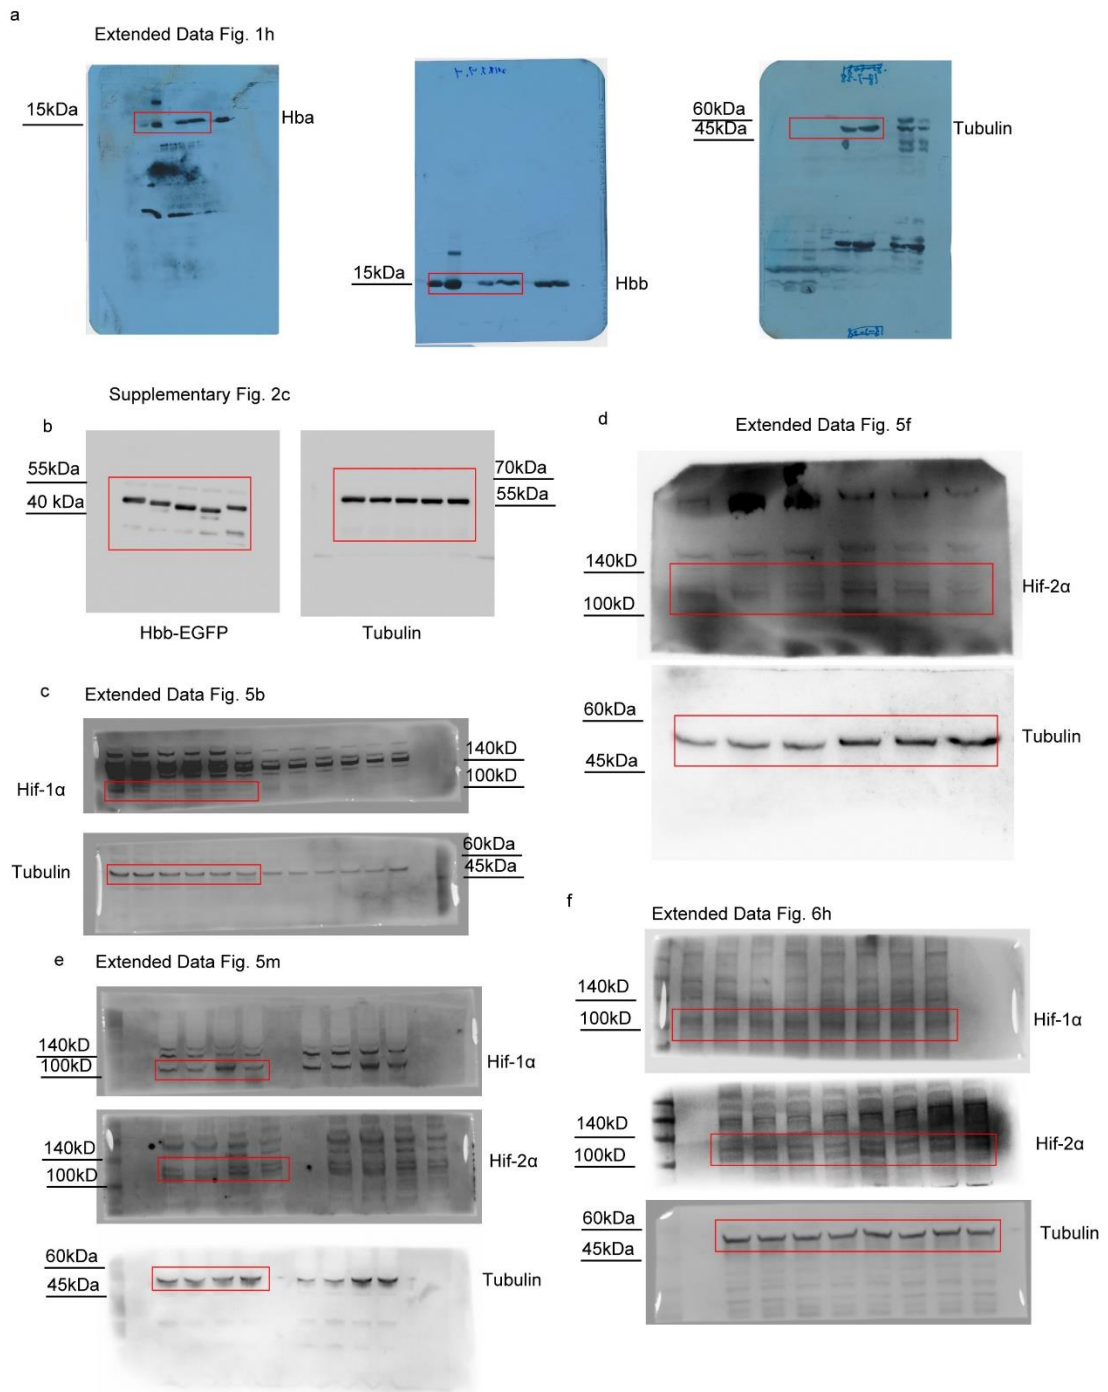

**Supplementary Fig. 1 (a-f) | Original source images for Western blot data.** Original Western blot images of Extended Data and Supplementary Figures. All images of replicates per experiment or repeated experiments were shown.

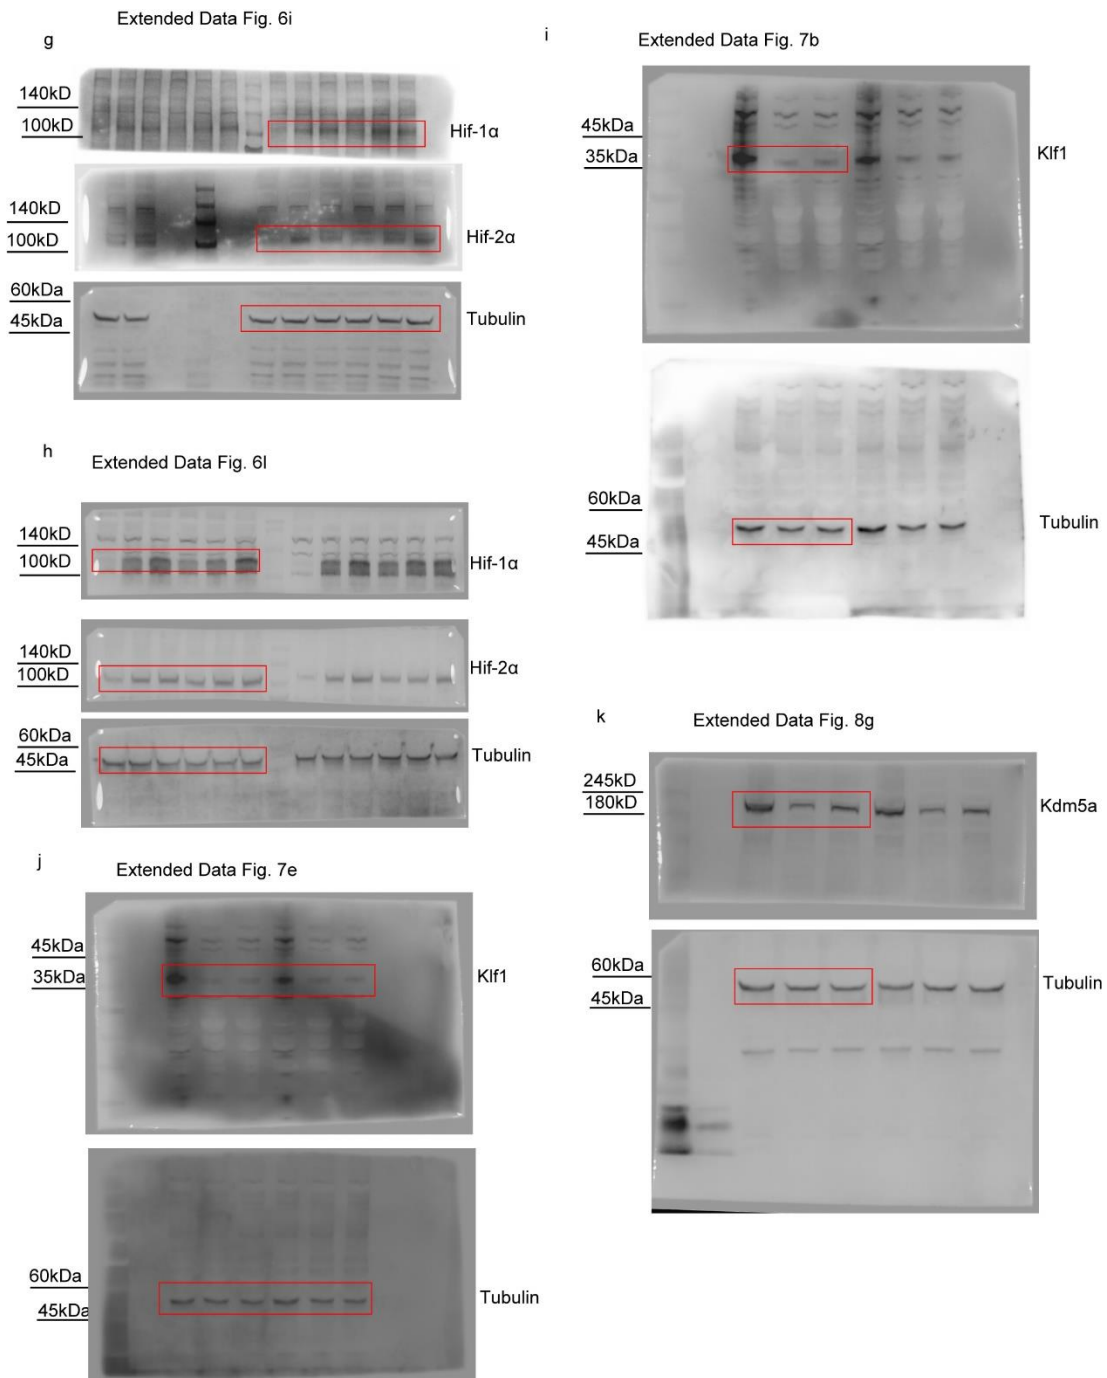

**Supplementary Fig. 1 (g-k) | Original source images for Western blot data.** Original Western blot images of Extended Data and Supplementary Figures. All images of replicates per experiment or repeated experiments were shown.

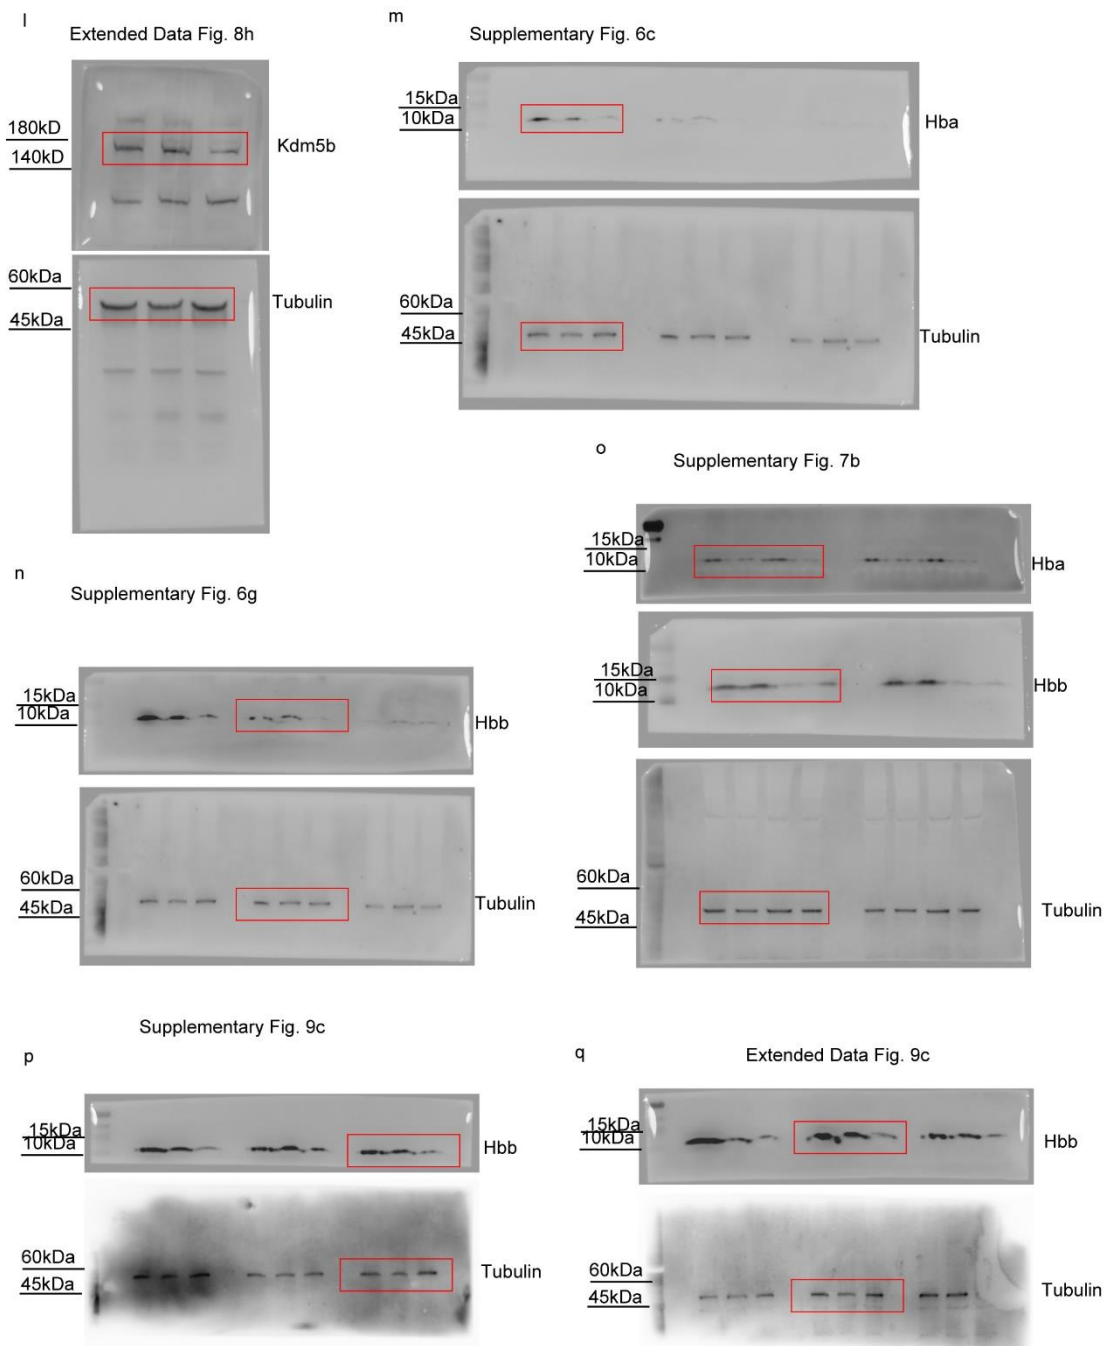

**Supplementary Fig. 1 (i-q) | Original source images for Western blot data.** Original Western blot images of Extended Data and Supplementary Figures. All images of replicates per experiment or repeated experiments were shown.

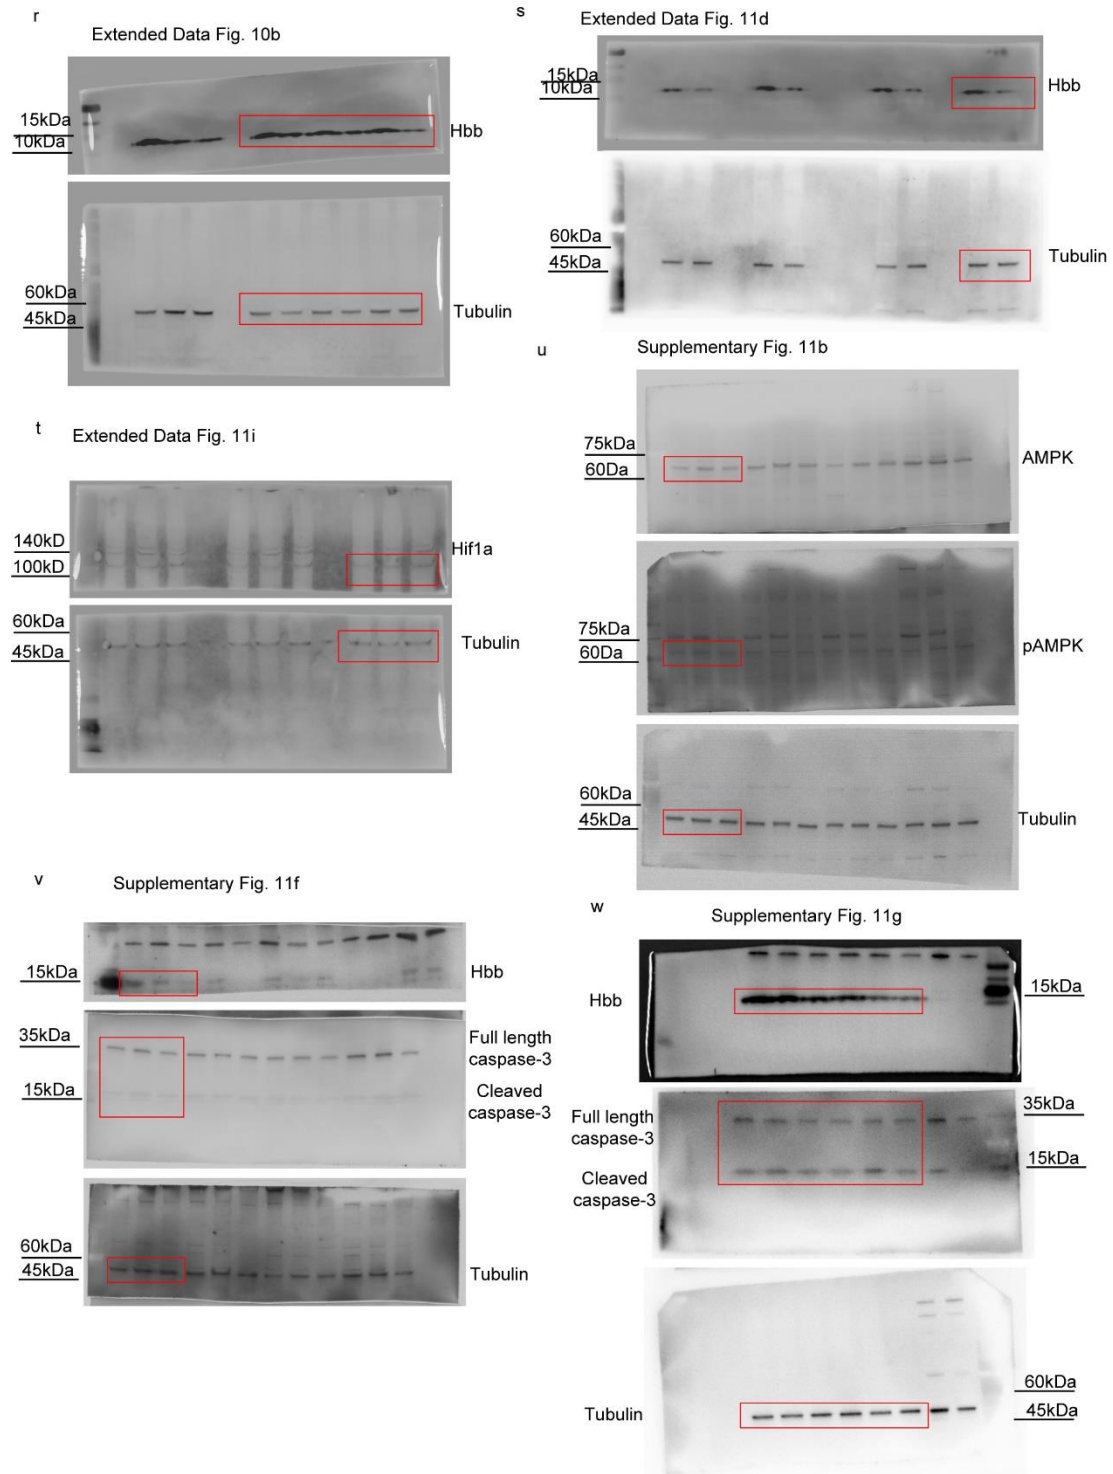

**Supplementary Fig. 1 (r-w) | Original source images for Western blot data.** Original Western blot images of Extended Data and Supplementary Figures. All images of replicates per experiment or repeated experiments were shown.

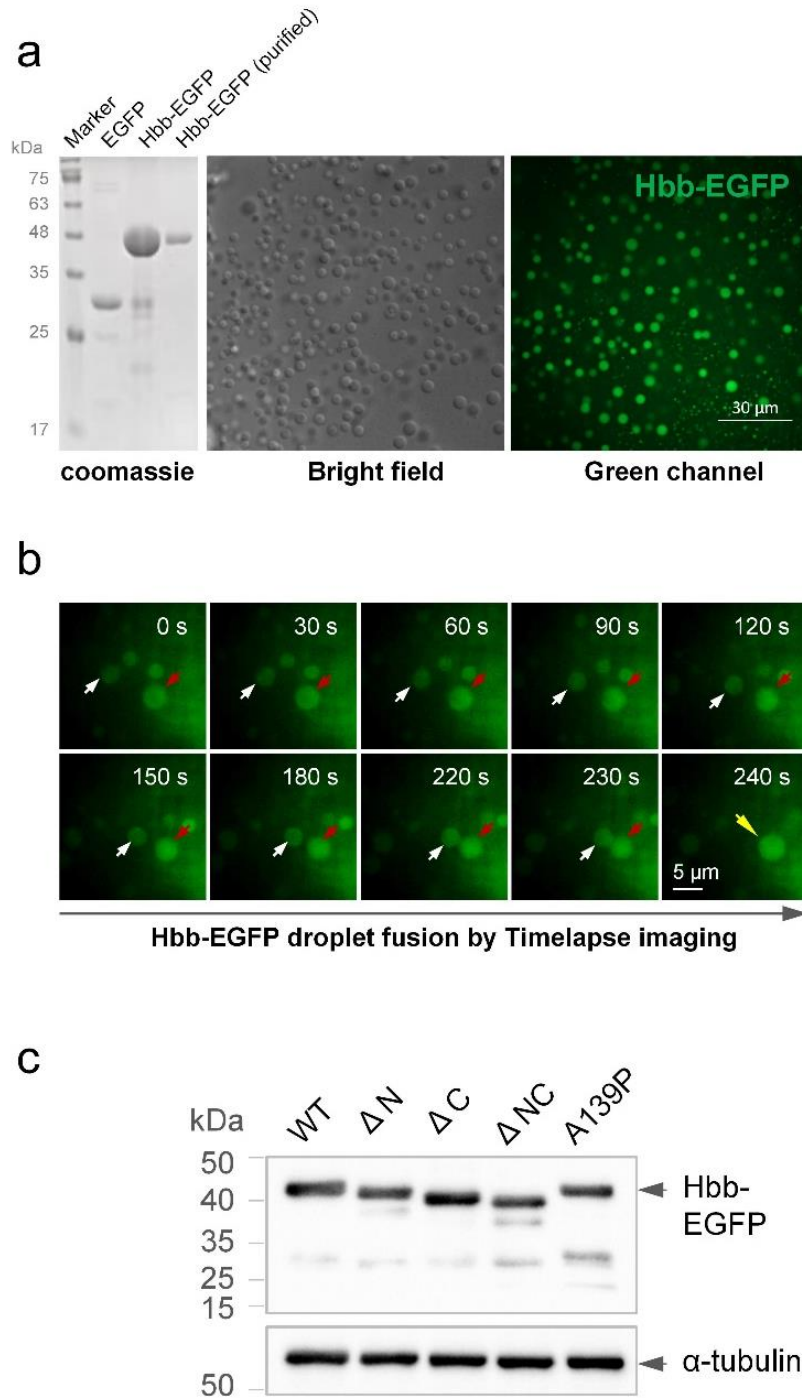

**Supplementary Fig. 2 | Liquid phase separation of Hbb-EGFP *in vitro*.** **a**, Coomassie brilliant blue stained gel of the purified Hbb-EGFP protein (left panel) and liquid phase separation of Hbb-EGFP in LLPS buffer (150 mM  $\text{KH}_2\text{PO}_4/\text{K}_2\text{HPO}_4$ , pH 7.35, PEG2000 10% (w/v)). **b**, Timelapse imaging of Hbb-EGFP droplet fusion, white arrows and red arrows indicate droplets before fusion, yellow arrow indicates fused droplet. Scale bar: 5  $\mu$ m. **c**, Western blot analysis of Hbb-EGFP and its mutant expression in 293T cells. For gel source data, see Supplementary Fig.1b.

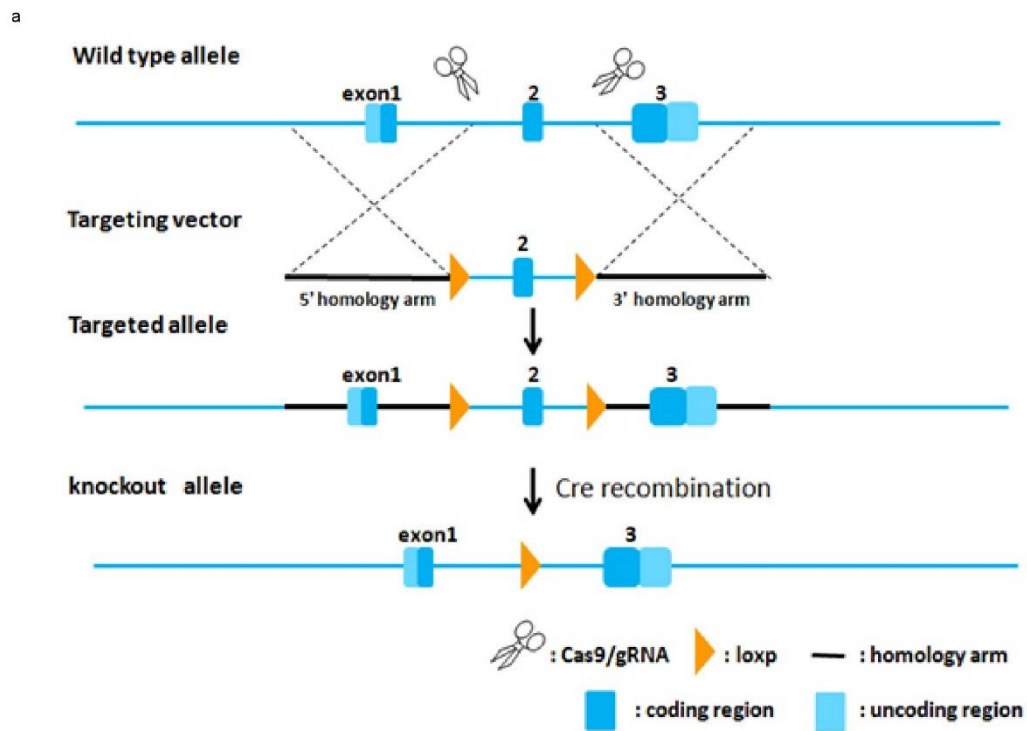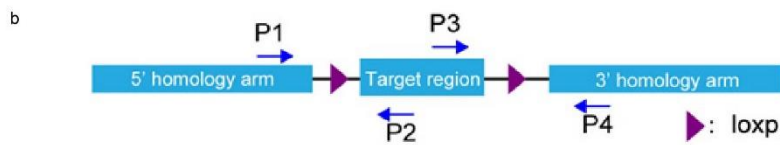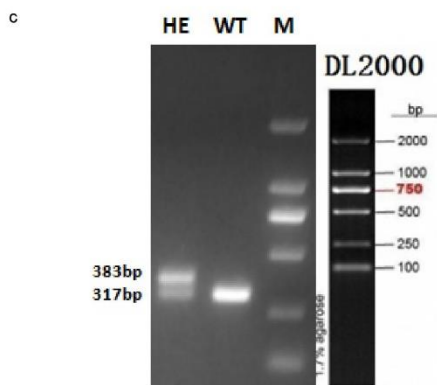

**Supplementary Fig. 3 | Generation of *Klf1*<sup>F/F</sup> mice.** **a**, A targeting vector was designed to replace the exon 2 of *Klf1* (*Klf1*<sup>F/F</sup>). **b**, **c**, Genotyping by amplifying the specific WT (317 bp) and mutant (383 bp) DNA fragments by PCR with the P1 and P2 primer pair.

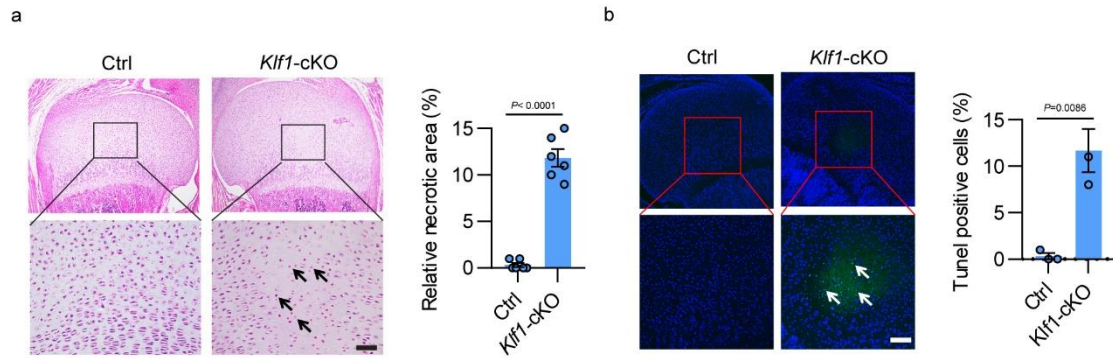

**Supplementary Fig. 4 | Phenotypes of *Klf1* conditional knockout mice.** **a**, Conditional knockout of *Klf1* resulted in massive cell death in the center of cartilaginous growth plate. Quantification of all biological replicates is provided on the right. Scale bar: 50  $\mu$ m. n=6. Error bars represent SEM. P values were calculated using two-tailed Student's t-test. **b**, TUNEL assay of the proximal humeral cartilages of *Klf1*<sup>F/F</sup> (Ctrl) or *Klf1*<sup>F/F</sup>/*Col2a1-Cre*<sup>ERT2</sup> (*Klf1*-cKO) growth plates of P5 mice, which were treated by tamoxifen (100mg/kg) for 4 days. Quantification of all biological replicates is provided on the right. Arrows indicated dead chondrocytes. Green fluorescence marked the dead cells. Scale bars, 50  $\mu$ m. n = 3. Error bars represent SEM. P values were calculated using two-tailed Student's t-test. The exact P-values of comparison are presented in the figures, respectively.

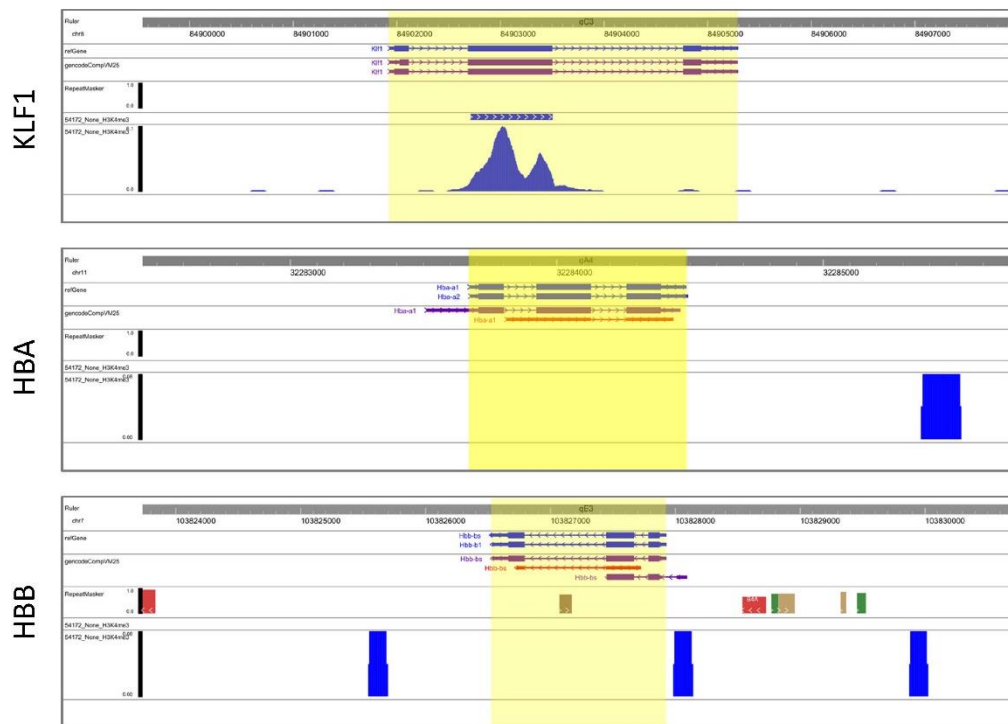

**Supplementary Fig. 5 | Histone H3 Lys 4 trimethylation (H<sub>3</sub>K<sub>4</sub>me<sub>3</sub>) level at the region of the indicated genes.** Results were obtained at website: <http://cistrome.org/db/#/>, source data were derived from CHIP-seq data provided by Ohba S, et al (Cell Rep, 2015).



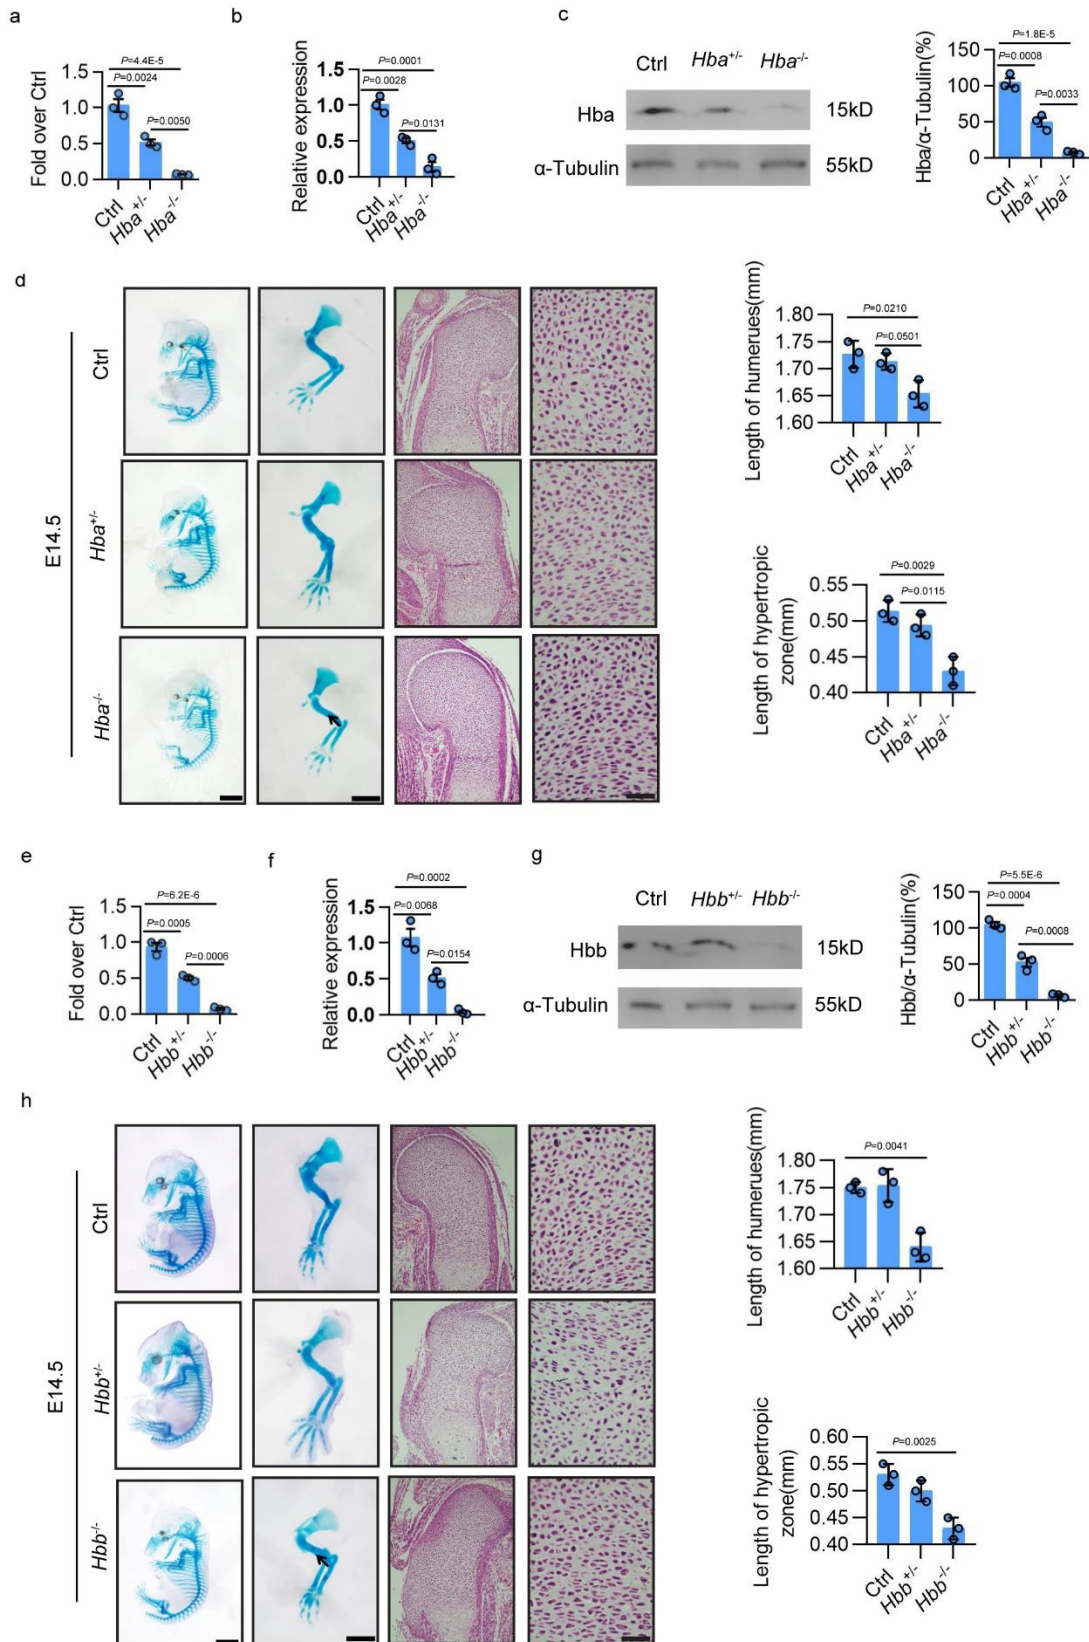

**Supplementary Fig. 6 | Skeleton analysis of hemoglobin knockout mice at E14.5. a**, qPCR of genomic DNA extracted from *Hba*<sup>+/+</sup>(Ctrl), *Hba*<sup>+/-</sup> or *Hba*<sup>-/-</sup> growth plates of E14.5 mice. Data were normalized to  $\beta$ 2-microglobulin (n=3 biologically independent samples). **b**, Quantification of

*Hba* mRNA by qRT-PCR of total RNA extracted from E14.5 *Hba*<sup>+/+</sup>(Ctrl), *Hba*<sup>+/-</sup> or *Hba*<sup>-/-</sup> growth plates. Data were normalized to *Gapdh* (n=3 biologically independent samples). **c**, Quantification of Hba protein by Western blot analysis of total protein lysate extracted from E14.5 *Hba*<sup>+/+</sup>(Ctrl), *Hba*<sup>+/-</sup> or *Hba*<sup>-/-</sup> growth plates. A representative Western blot is shown on the left, and quantification of all biological replicates is provided on the right. Data were normalized to  $\alpha$ -tubulin (n=3 biologically independent samples). For gel source data, see Supplementary Fig.1m. **d**, Skeleton analysis indicated mild delay of cartilage hypertrophy in mice of homozygous knockout of *Hba*. Black arrow indicated the delayed hypertrophic regions. Scale bars: 1.5 mm (left), 0.5 mm (right). n=3 biologically independent samples. No noticeable pattern defect of cartilaginous growth plates of E14.5 mice was detected upon knockout of *Hba* by histology examination. Scale bar, 50  $\mu$ m. n=3 biologically independent samples. For gel source data, see Supplementary Fig.1m. **e**, qPCR of genomic DNA extracted from *Hbb*<sup>+/+</sup>(Ctrl), *Hbb*<sup>+/-</sup> or *Hbb*<sup>-/-</sup> growth plates of E14.5 mice. Data were normalized to  $\beta$ 2-microglobulin (n = 3). **f**, Quantification of *Hbb* mRNA by qRT-PCR of total RNA extracted from E14.5 *Hbb*<sup>+/+</sup>(Ctrl), *Hbb*<sup>+/-</sup> or *Hbb*<sup>-/-</sup> growth plates. Data were normalized to *Gapdh* (n=3 biologically independent samples). **g**, Quantification of Hbb protein by Western blot analysis of total protein lysate extracted from E14.5 *Hbb*<sup>+/+</sup>(Ctrl), *Hbb*<sup>+/-</sup> or *Hbb*<sup>-/-</sup> growth plates. A representative Western blot is shown on the left, and quantification of all biological replicates is provided on the right. Data were normalized to  $\alpha$ -tubulin (n=3 biologically independent samples). For gel source data, see Supplementary Fig.1n. **h**, Skeleton analysis indicated mild delay of cartilage hypertrophy in mice of homozygous knockout of *Hbb*. Black arrow indicated the delayed hypertrophic regions. Scale bars: 1.5 mm (left), 0.5 mm (right). n=3 biologically independent samples. No noticeable pattern defect of cartilaginous growth plates of E14.5 mice was detected upon knockout of *Hbb* by histology examination. Scale bar, 50  $\mu$ m. n=3 biologically independent samples. Error bars represent SEM. *P* values were calculated using one-way ANOVA tests (**a-h**). The exact *P*-values of comparison are presented in the figures, respectively.

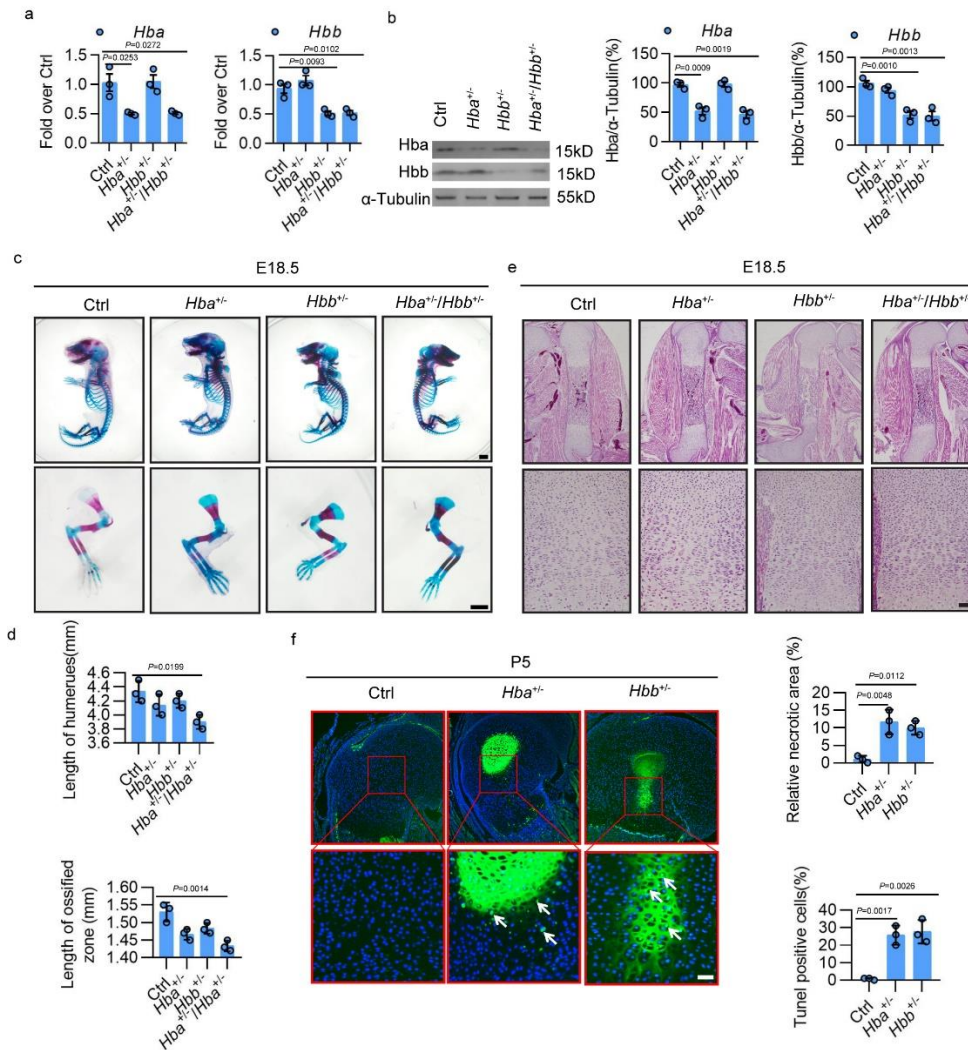

**Supplementary Fig. 7 | Phenotypes of heterozygous hemoglobin knockout mice at E18.5.** *a*, *Hba* and *Hbb* qPCR of genomic DNA extracted from wildtype (Ctrl), *Hba*<sup>+/-</sup>, *Hbb*<sup>+/-</sup> or *Hba*<sup>+/-</sup>/*Hbb*<sup>+/-</sup> growth plates of E18.5 mice. Data were normalized to  $\beta$ 2-microglobulin (n=3 biologically independent samples). *b*, Quantification of *Hba* and *Hbb* protein by Western blot analysis of total protein lysate extracted from E18.5 wildtype (Ctrl), *Hba*<sup>+/-</sup>, *Hbb*<sup>+/-</sup> or *Hba*<sup>+/-</sup>/*Hbb*<sup>+/-</sup> growth plates. Quantification of all biological replicates is provided on the right. Data were normalized to  $\alpha$ -tubulin (n=3 biologically independent samples). For gel source data, see Supplementary Fig.10. *c*, *d*, Skeleton analysis indicated mild phenotypes in the length of humerus and ossified zone of *Hba/Hbb* double heterozygous knockout mice. Quantification of all biological replicates is provided (*d*). Scale bars: 3 mm (up), 1.5 mm (low). n=3 biologically independent samples. *e*, No obvious pattern defect of cartilaginous growth plates was detected in *Hba/Hbb* double heterozygous knockout mice at E18.5 by histology examination. Scale bar, 100  $\mu$ m. n=6 biologically independent samples. *f*, TUNEL assay of proximal humeral cartilages of P5 mice. Quantification of all biological replicates is provided on the right. Control: wild type mice, *Hba*<sup>+/-</sup> and *Hbb*<sup>+/-</sup>: the heterozygous littermates of *Hba* or *Hbb* genes, respectively. Arrows and green fluorescence marked the dead cells. Scale bars, 50  $\mu$ m. n=3 biologically independent samples. Error bars represent SEM. *P* values were calculated using one-way ANOVA tests (*a*, *b*, *d*, *f*). The exact *P*-values of comparison are presented in the figures, respectively.

a

Schematic of conditional knockout mouse construction strategy

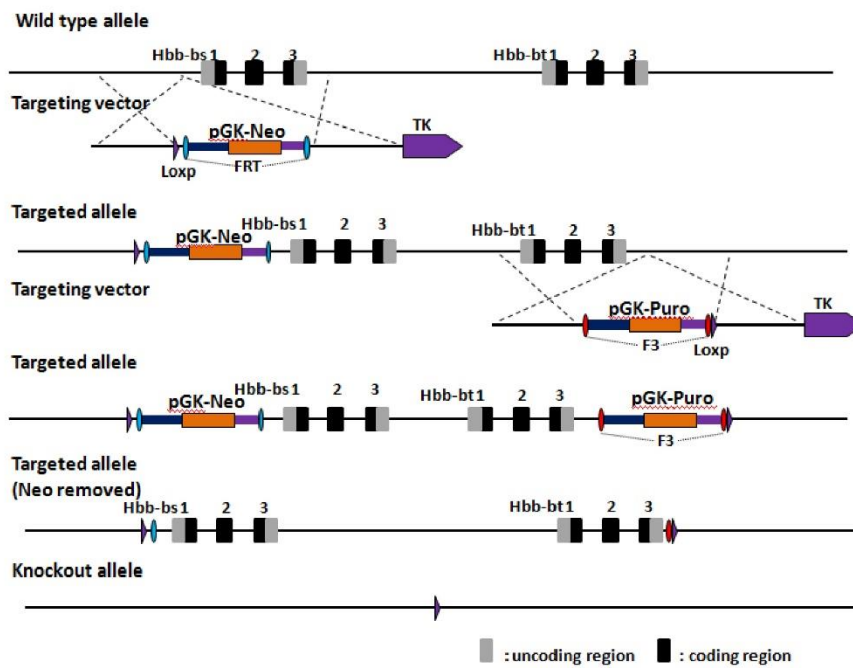

b

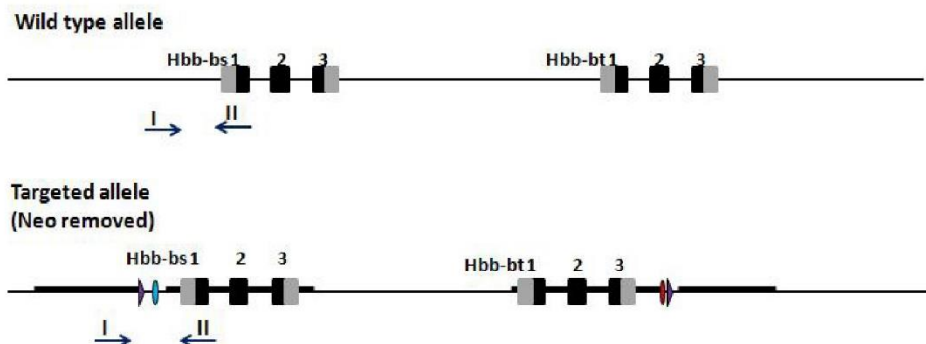

c

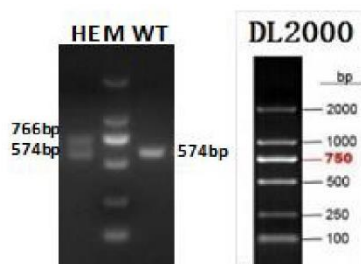

PCR identification  
 Separated by gel electrophoresis on a 1.2% agarose gel.  
 WT: one band with 574 bp;  
 Heterozygous: two bands with 574 and 766 bp;  
 Homozygous: one band with 766 bp;

**Supplementary Fig. 8 | Generation of *Hbb*<sup>F/F</sup> mice.** **a**, A targeting vector was designed to replace the region spanning the 1<sup>st</sup> exon to the 3<sup>rd</sup> exon of both *Hbb-bs* and *Hbb-bt* (*Hbb*<sup>F/F</sup>). **b**, **c**, Genotyping by amplifying the specific WT (574 bp) and mutant (766 bp) DNA fragments by PCR with the P1 and P2 primer pair.

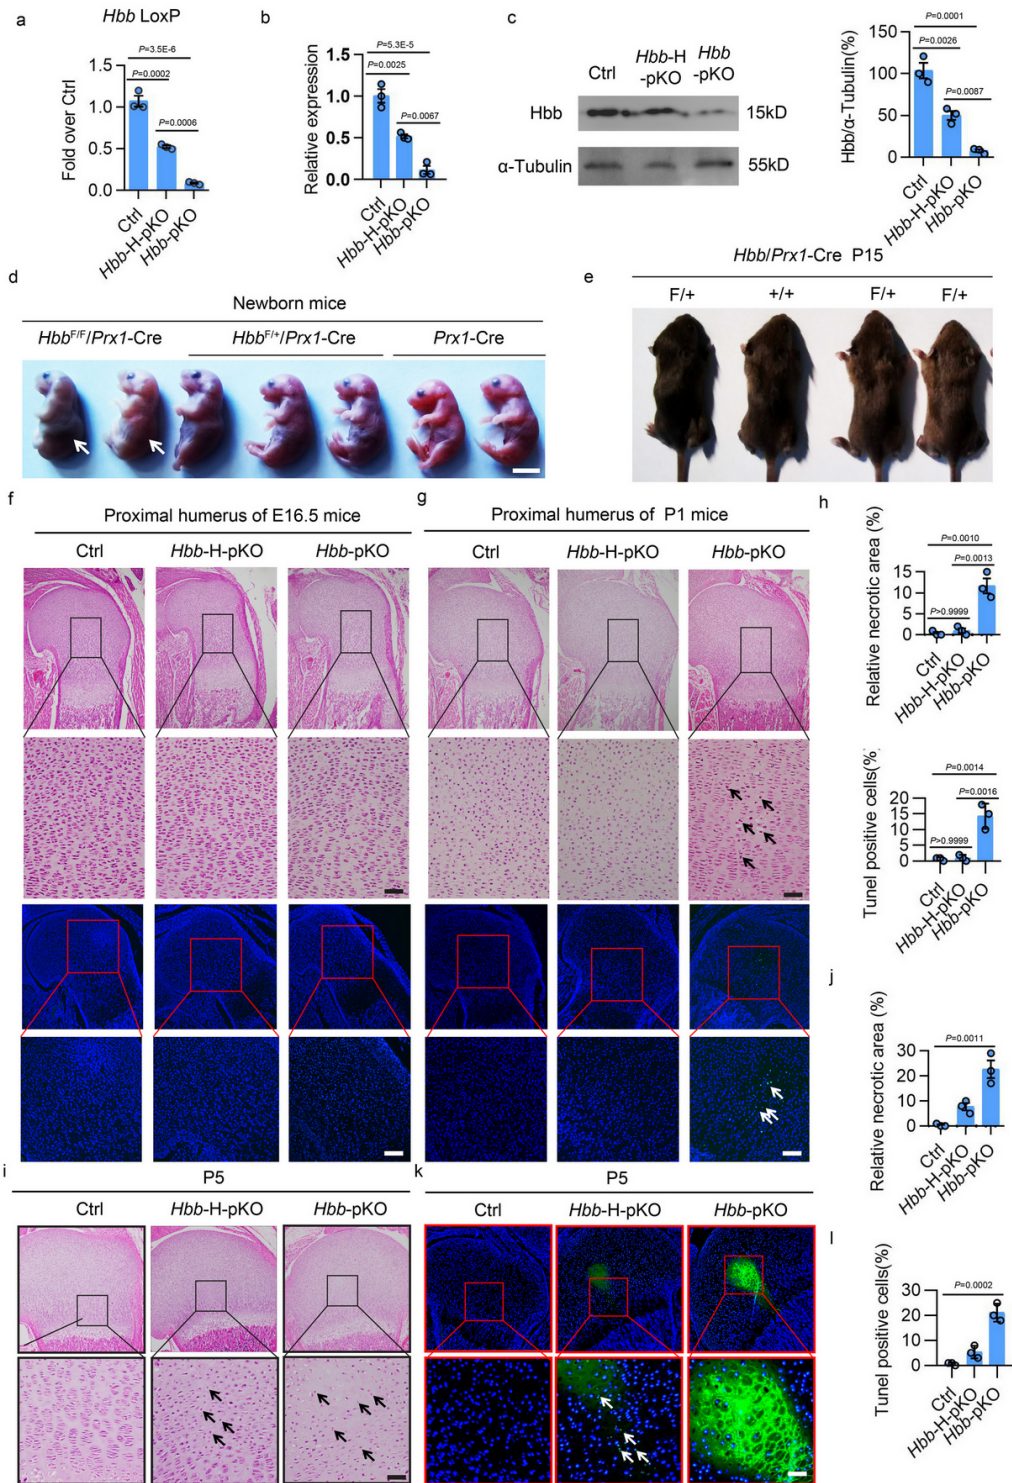

**Supplementary Fig. 9 | Phenotypes of mice with *Hbb* conditional knockout by *Prx1*-Cre. a, *Hbb*-LoXP qPCR of genomic DNA extracted from *Hbb*<sup>F/F</sup> (Ctrl), *Hbb*<sup>F/+</sup>/*Prx1*-Cre (heterozygous deletion, *Hbb*-H-pKO) or *Hbb*<sup>F/F</sup>/*Prx1*-Cre (*Hbb*-pKO) growth plates of P5 mice. Data were**

normalized to  $\beta$ 2-microglobulin (n=3 biologically independent samples). **b**, Quantification of *Hbb* mRNA by qRT-PCR of total RNA extracted from P5 *Hbb*<sup>F/F</sup> (Ctrl), *Hbb*-H-pKO or *Hbb*-pKO growth plates. Data were normalized to *Gapdh* (n=3 biologically independent samples). **c**, Quantification of Hbb protein by Western blot analysis of total protein lysate extracted from P5 *Hbb*<sup>F/F</sup> (Ctrl), *Hbb*-H-pKO or *Hbb*-pKO growth plates. A representative Western blot is shown on the left, and quantification of all biological replicates is provided on the right. Data were normalized to  $\alpha$ -tubulin (n=3 biologically independent samples). For gel source data, see Supplementary Fig.1p. **d**, Most *Hbb*<sup>F/F</sup>/*Prx1-Cre* neonatal mice were pale and died within 1~7 days after birth. White arrows indicated dead neonatal mice. Scale bar, 3 mm. **e**, Mice with *Hbb* heterozygous deletion in mesenchymal cells survived to adult and were fertile. Scale bar, 10 mm. **f**, Histology examination (two upper panels) or TUNEL assay (two bottom panels) of proximal humeral cartilages of E16.5 mice with genotype of *Hbb*<sup>F/F</sup> (Ctrl), *Hbb*-H-pKO or *Hbb*-pKO. Scale bars, 50  $\mu$ m. n=3 biologically independent samples. **g**, **h**, Histology examination (two upper panels) or TUNEL assay (two bottom panels) of *Hbb*<sup>F/F</sup> (Ctrl), *Hbb*-H-pKO or *Hbb*-pKO proximal humeral cartilages of P1 mice. Quantification of all biological replicates is provided (**h**). Arrows indicated dead chondrocytes. Green fluorescence marked the dead cells. Scale bars, 50  $\mu$ m. n=3 biologically independent samples. **i-l** P5 littermates of *Hbb*-pKO mice exhibited massive cell death in the inner zones of developing growth plates by histology examination (**i**) or TUNEL assay (**k**). Quantification of all biological replicates is provided (**j**, **l**). Arrows indicated dead chondrocytes. Scale bar: 50  $\mu$ m. n=3 biologically independent samples. Error bars represent SEM. *P* values were calculated using one-way ANOVA tests (**a-c**, **h**, **j**, **l**). The exact *P*-values of comparison are presented in the figures, respectively.

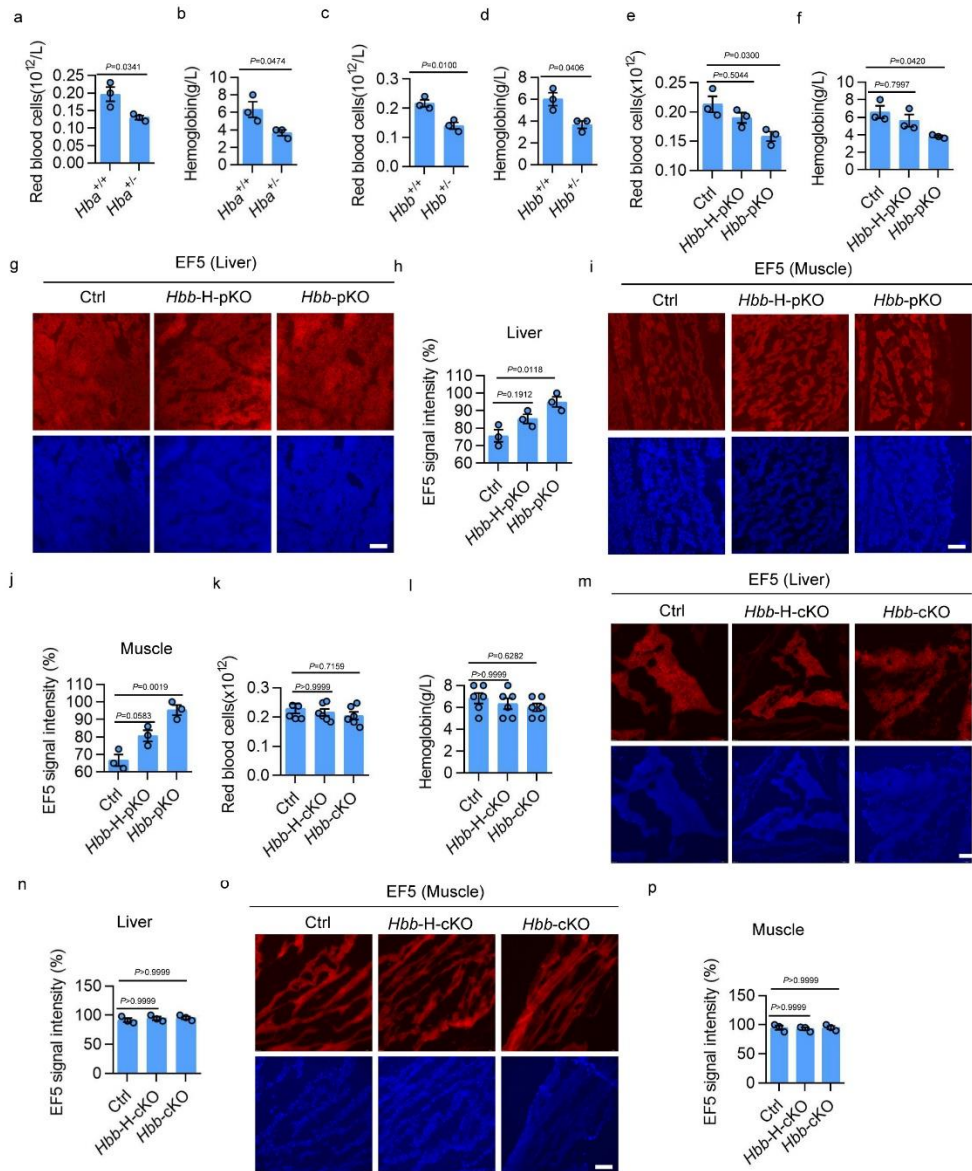

**Supplementary Fig. 10 | Examination of tissue hypoxia upon hemoglobin knockout.** **a-f**, Red blood cells counts (**a**, **c**, **e**) and hemoglobin levels (**b**, **d**, **f**) in P5 mice with indicated genotypes. Data are presented as mean  $\pm$  SEM;  $n=3$  biologically independent samples. **g-j**, Representative images and quantification of all biological replicates for EF5 staining of livers (**g**, **h**) or muscles (**i**, **j**) of  $Hbb^{F/F}$ (Ctrl),  $Hbb^{F/+}/Prx1-Cre$  (heterozygous deletion,  $Hbb-H-pKO$ ) or  $Hbb^{F/F}/Prx1-Cre$  ( $Hbb-pKO$ ) of P5 mice. Scale bars: 50  $\mu$ m. Data are presented as mean  $\pm$  SEM, Error bars represent SEM; ( $n=3$  biologically independent samples). **k, l**, Red blood cell counts and hemoglobin levels in P5 mice with indicated genotypes. Data are presented as mean  $\pm$  SEM;  $n=6$  biologically independent samples. **m-p**, Representative images and quantification of all biological replicates for EF5 staining of livers (**m**, **n**) or muscles (**o**, **p**) of  $Hbb^{F/F}$ (Ctrl),  $Hbb^{F/+}/Col2a1-Cre^{ERT2}$ (heterozygous deletion,  $Hbb-H-cKO$ ) or  $Hbb^{F/F}/Col2a1-Cre^{ERT2}$  ( $Hbb-cKO$ ) of P5 mice, which were treated by tamoxifen (100 mg/kg) for 4 days. Scale bars: 50  $\mu$ m. Data are presented as mean  $\pm$  SEM, Error bars represent SEM; ( $n=3$  biologically independent samples).  $P$  values were calculated using two-tailed Student's  $t$ -test (**a-d**) or one-way ANOVA tests (**e, f, h, j-l, n, p**). The exact  $P$ -values of comparison are presented in the figures, respectively.

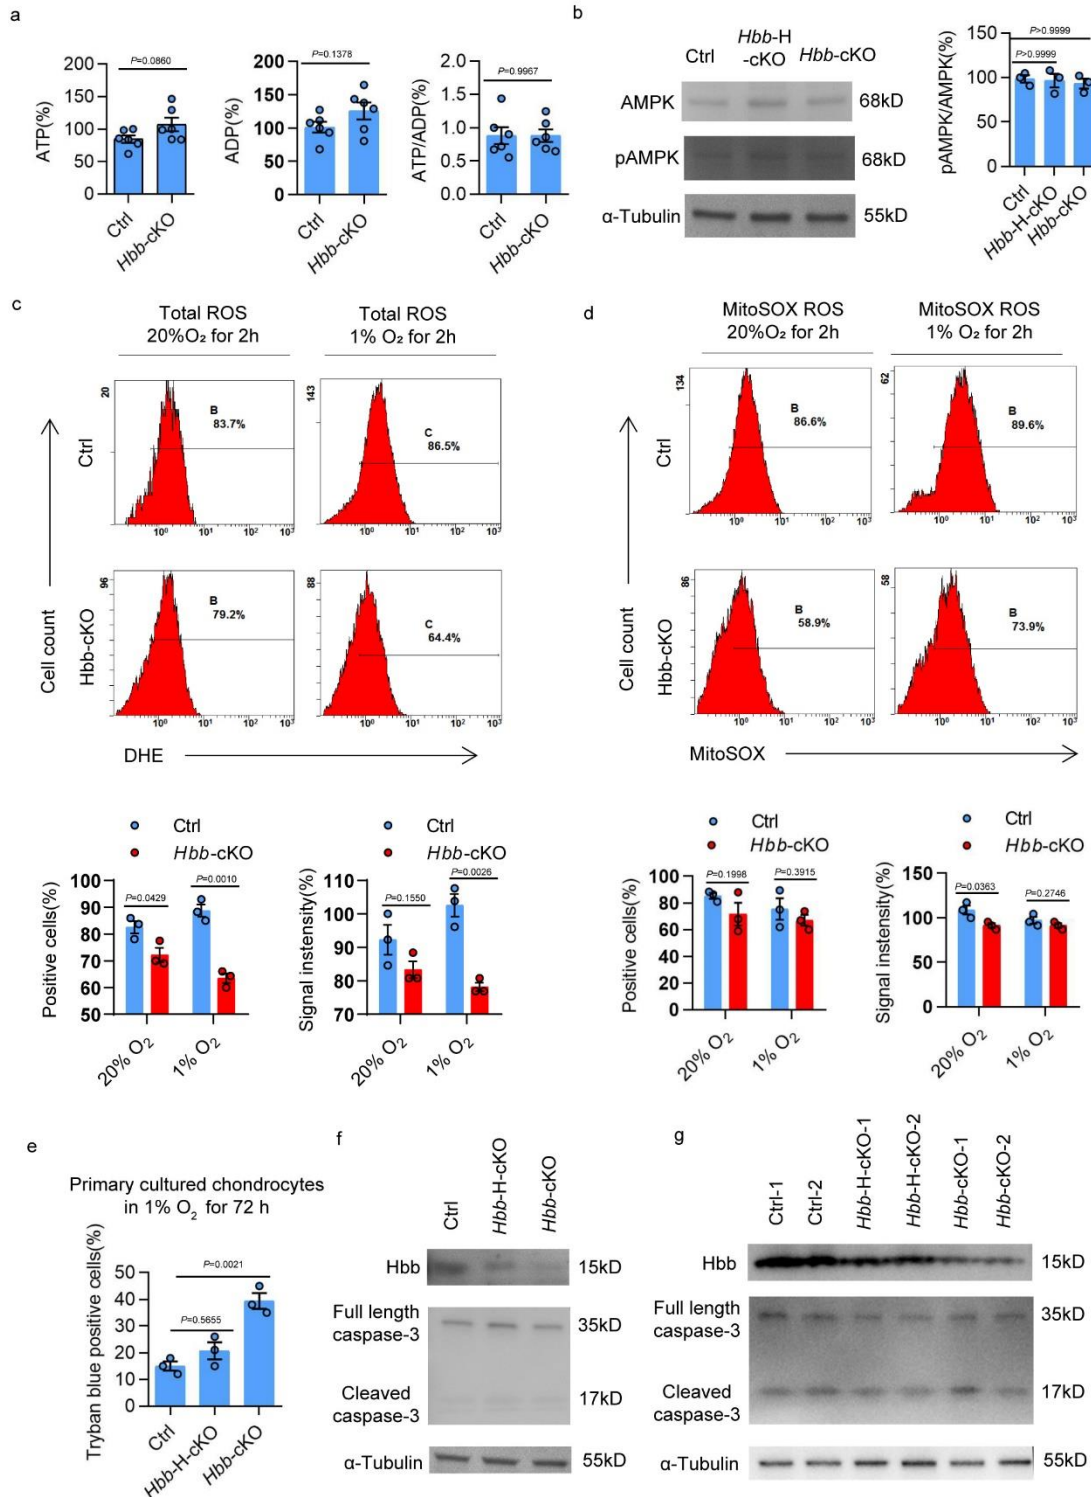

**Supplementary Fig. 11 | Energy status, ROS production and apoptosis in chondrocytes with *Hbb* conditional knockout by *Col2a1-Cre*.** **A**, Intracellular ATP, ADP, ATP/ADP ratio in chondrocytes isolated from *Hbb*<sup>F/F</sup>(Ctrl) or *Hbb*<sup>F/F</sup>/*Col2a1*<sup>ERT2</sup>(*Hbb*-cKO) growth plates of P5 mice, which were treated by tamoxifen (100 mg/kg) for 4 days. Data were calculated as percentage of Ctrl (n=6 biologically independent samples). **B**, Quantification of AMPK and pAMPK proteins by Western blot analysis of total protein lysate extracted from chondrocytes isolated from *Hbb*<sup>F/F</sup> (Ctrl), *Hbb*<sup>F/+</sup>/*Col2a1-Cre*<sup>ERT2</sup> (heterozygous deletion, *Hbb*-H-cKO) or



*Hbb<sup>F/F</sup>/Col2a1-Cre<sup>ERT2</sup>* (*Hbb*-cKO) growth plates of P5 mice, which were treated by tamoxifen (100 mg/kg) for 4 days. Representative Western blot s are shown on the left and quantification of all biological replicates is provided on the right. Data for AMPK and pAMPK were normalized to  $\alpha$ -tubulin, and calculated as percentage of the signal intensity of Ctrl (n=3 biologically independent experiments). For gel source data, see Supplementary Fig.1u. **c, d**, FACS analysis of total ROS **c** and mitochondrial ROS (**d**) in chondrocytes isolated from *Hbb<sup>F/F</sup>* (Ctrl) or *Hbb<sup>F/F</sup>/Col2a1-Cre<sup>ERT2</sup>* (*Hbb*-cKO) P5 growth plates, which were treated by tamoxifen (100 mg/kg) for 4 days, and cultured in 20% or 1% O<sub>2</sub>. A representative experiment is shown at the top; quantification of all biological replicates is provided at the bottom (n=3 biologically independent samples). Signal intensity was calculated as percentage of Ctrl in 20% O<sub>2</sub>. Data are presented as mean  $\pm$  SEM. **e, f**, Counting of dead cells by trypan blue staining in primary cultured chondrocytes isolated from *Hbb<sup>F/F</sup>* (Ctrl), *Hbb*-H-cKO, and *Hbb*-cKO newborn growth plates and maintained in 1% O<sub>2</sub> for 72 h (n=3 biologically independent experiment). (**e**). Western blot analysis of total protein lysate extracted from primary cultured chondrocytes with an antibody specific for both full length (35 kDa) and cleaved (17–19 kDa) Caspase-3 (n=3 biologically independent experiments) (**f**). For gel source data, see Supplementary Fig.1v. **g**, Western blot analysis of total protein lysate extracted from chondrocytes of growth plates isolated from P5 *Hbb<sup>F/F</sup>* (Ctrl), *Hbb<sup>F/+</sup>/Col2a1-Cre<sup>ERT2</sup>* (heterozygous deletion, *Hbb*-H-cKO) or *Hbb<sup>F/F</sup>/Col2a1-Cre<sup>ERT2</sup>* (*Hbb*-cKO) growth plates, which were treated by tamoxifen (100 mg/kg) for 4 days, with an antibody specific for both full length (35 kDa) and cleaved (17–19 kDa) Caspase-3. For gel source data, see Supplementary Fig.1w. n=3 biologically independent experiments. Error bars represent SEM. *P* values were calculated using two-tailed Student's *t*-test (**a, c, d**) or one-way ANOVA tests (**b, e**). The exact *P*-values of comparison are presented in the figures, respectively.

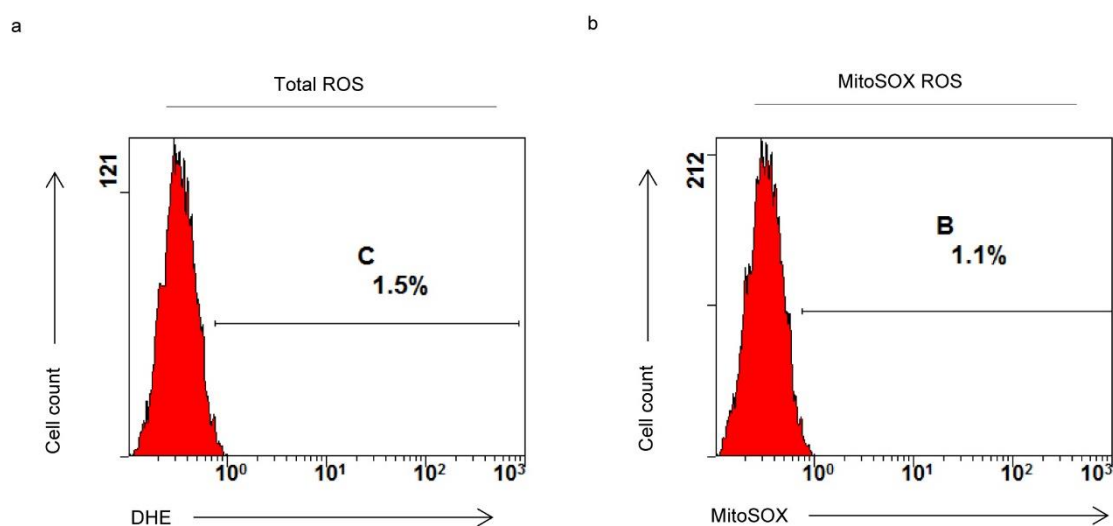

**Supplementary Fig. 12 | Gating strategies used for ROS examination by FACS.** **a**, Gating strategy correspond to FACS data in Supplementary Fig. 11c for examination of total ROS in chondrocytes. The chondrocytes for Gating were as negative control and incubated without 5 mM dihydroethidium (DHE) probe. (n=3 biologically independent samples). **b**, Gating strategy correspond to FACS data in Supplementary Fig. 11d for examination of mitochondrial ROS in chondrocytes. The chondrocytes for Gating were as negative control and incubated without 5 mM MitoSOX probe. (n=3 biologically independent samples).

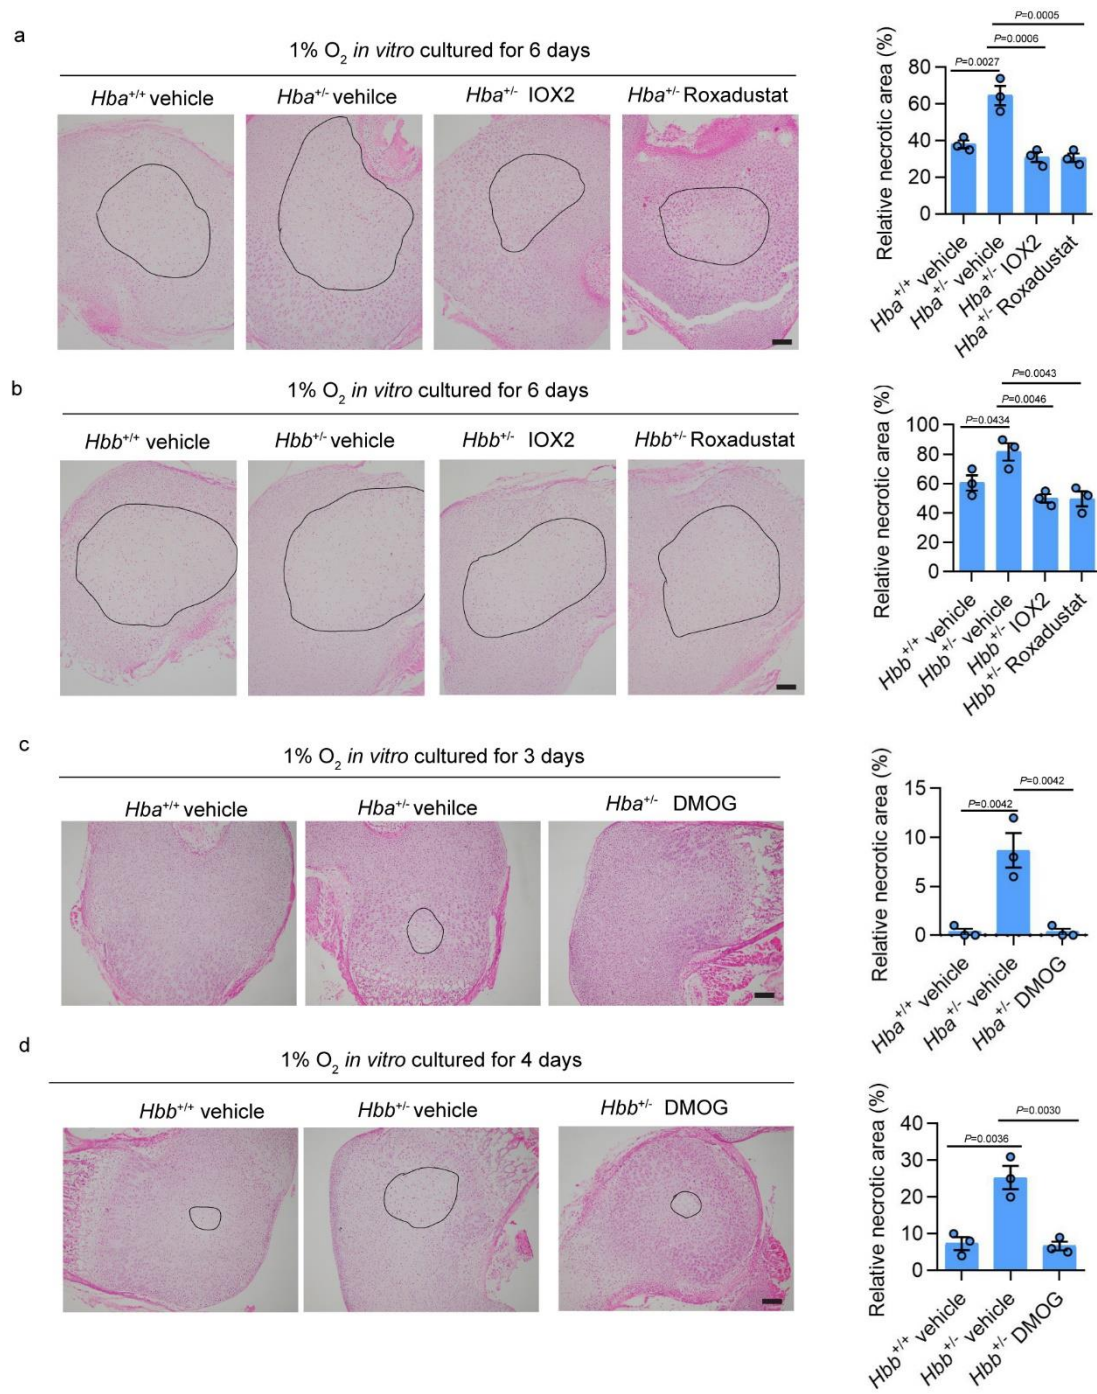

**Supplementary Fig. 13 | Rescue of hemoglobin depletion-induced cell death by Hifs activation under hypoxia condition.** **a-d**, Histology examination of proximal humeral cartilages of Ctrl (Hba<sup>+/+</sup> or Hbb<sup>+/+</sup>), Hba<sup>+/-</sup> (**a, c**) or Hbb<sup>+/-</sup> (**b, d**) growth plates, which were treated by vehicle, IOX2 (50  $\mu$ M), Roxadustat (50  $\mu$ M) or DMOG (100  $\mu$ M) in 1% O<sub>2</sub> for 3~6 days. Quantification of all biological replicates is provided on the right. Scale bars, 200  $\mu$ m. *n*=3 biologically independent experiments. Error bars represent SEM. *P* values were calculated using one-way ANOVA tests. The exact *P*-values of comparison are presented in the figures, respectively.

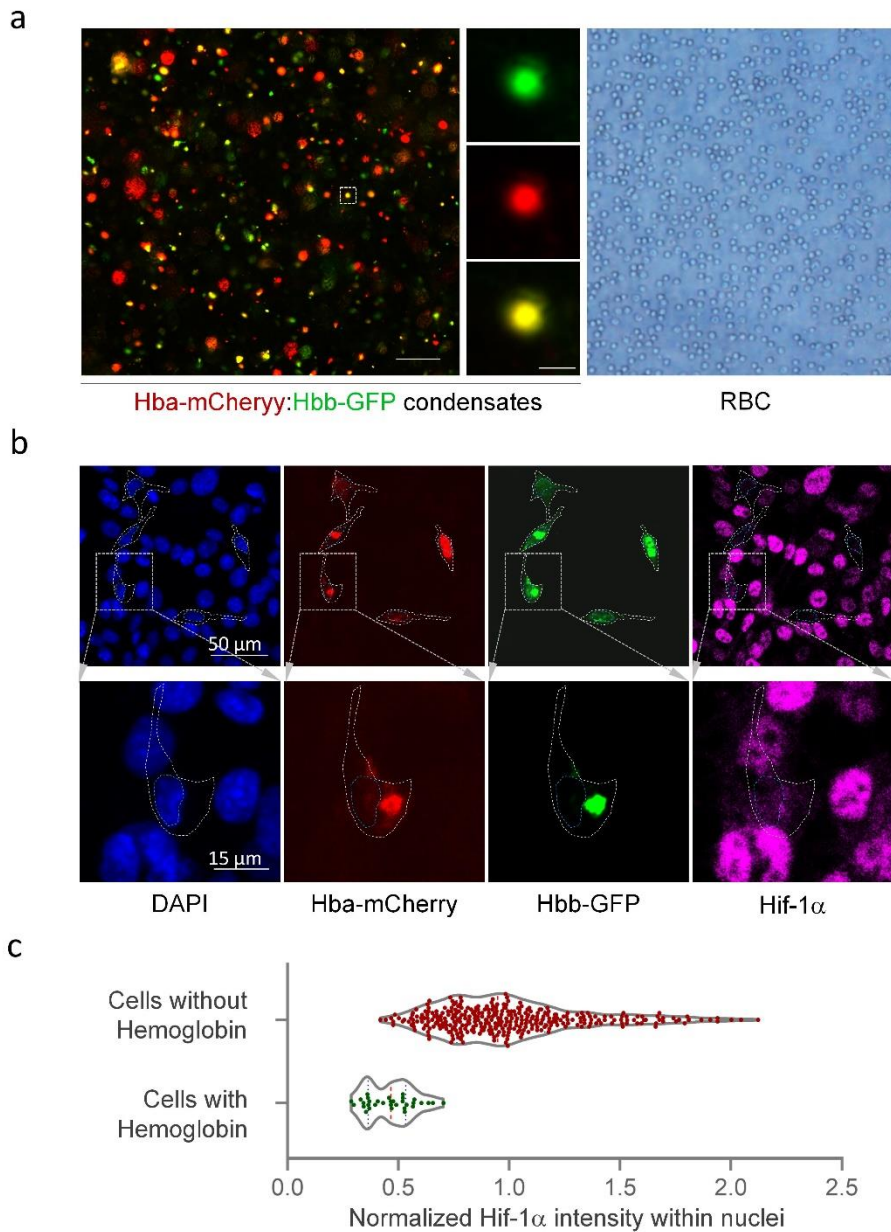

**Supplementary Fig. 14 | Hypoxia rescue by hemoglobin body.** **a**, Representative images of RBC (right panel) and hemoglobin condensates collected from 293T cells co-expressing Hba-mCherry and Hbb-EGFP (left panel for low magnification view, middle panel for zoomed view). Scale bar: 100  $\mu$ m (left), 10  $\mu$ m (middle). **b**, Representative images for Hif-1 $\alpha$  staining in ATDC5 cells. Hif-1 $\alpha$  in Deep pink, nuclei in blue, Hba-mCh in red, Hbb-EGFP in green. White dashed lines indicate outlines of foci positive cells, blue dashed lines indicate nuclei of foci positive cells. Scale bars: 50  $\mu$ m for the upper panel, 15  $\mu$ m for the lower panel. **c**, Quantification of the nuclear Hif-1 $\alpha$  intensities in ATDC5 cells. n =33 for foci positive cells, 341 for foci negative cells.
