# Supplementary material for: An extra-erythrocyte role of haemoglobin body in chondrocyte hypoxia adaption
Source: PubMed Central journal article supplement (PMC10600011; doi:10.1038/s41586-023-06611-6), 2023-10-04
Supplement: 41586_2023_6611_MOESM2_ESM.pdf [file 41586_2023_6611_MOESM2_ESM.pdf]

## Reporting Summary

Nature Portfolio wishes to improve the reproducibility of the work that we publish. This form provides structure for consistency and transparency in reporting. For further information on Nature Portfolio policies, see our [Editorial Policies](#) and the [Editorial Policy Checklist](#).

### Statistics

For all statistical analyses, confirm that the following items are present in the figure legend, table legend, main text, or Methods section.

n/a Confirmed

- The exact sample size ( $n$ ) for each experimental group/condition, given as a discrete number and unit of measurement
- A statement on whether measurements were taken from distinct samples or whether the same sample was measured repeatedly
- The statistical test(s) used AND whether they are one- or two-sided  
*Only common tests should be described solely by name; describe more complex techniques in the Methods section.*
- A description of all covariates tested
- A description of any assumptions or corrections, such as tests of normality and adjustment for multiple comparisons
- A full description of the statistical parameters including central tendency (e.g. means) or other basic estimates (e.g. regression coefficient) AND variation (e.g. standard deviation) or associated estimates of uncertainty (e.g. confidence intervals)
- For null hypothesis testing, the test statistic (e.g.  $F$ ,  $t$ ,  $r$ ) with confidence intervals, effect sizes, degrees of freedom and  $P$  value noted  
*Give  $P$  values as exact values whenever suitable.*
- For Bayesian analysis, information on the choice of priors and Markov chain Monte Carlo settings
- For hierarchical and complex designs, identification of the appropriate level for tests and full reporting of outcomes
- Estimates of effect sizes (e.g. Cohen's  $d$ , Pearson's  $r$ ), indicating how they were calculated

*Our web collection on [statistics for biologists](#) contains articles on many of the points above.*

### Software and code

Policy information about [availability of computer code](#)

#### Data collection

Western blot images were acquired and analyzed via the BioRad Image Lab system. Electron micrographs were captured by Gatan digital camera (832 SC1000, Gatan, Warrendale, PA, USA) and its application software (Gatan Digital Micrograph software v3.0). All data files of LC-MS/MS were created using Bioworks Browser rev.3.1 (Thermo Electron, San Jose, CA.). The acquired MS/MS spectra were searched against the concatenated target/reverse Glycine max database using the SEQUEST search engine (Proteome Discoverer Software v2.3.0.523). Cells timelapse imaging were taken with the Ultraview Vox confocal system (Perkin Elmer, Volocity v6.3.0). Oxygenation-dissociation analyser and its application software (BLOODOX-2018 Analyser, Softron Biotechnology, Beijing, China) was used to determinate oxygen dissociation curve. Red blood cells (RBCs) counts and hemoglobin concentration (Hb) were performed by automatic blood analyzer (Sysmex Corporation, Japan, XP-100) and its application software (XT2000i1800i IPU). FRAP assay was conducted using the FRAP module of the Nikon confocal microscopy system (NIS Elements AR v4.50.00). Flow cytometry was performed with aflow cytometer (Coulter-XL, USA), EXPO32 ADC Software was used for data collection and analysis. The serial sections for correlative light electron microscopy were finally automatically acquired by a Helios Nanolab 600i dual-beam SEM (Scanning Electron Microscope, Thermo Fisher, USA) with an automated imaging software (Auto SEE 1.58) and Fluorescence images were collected by a confocal microscope (Zeiss LSM 980) and processed by accompanying software (ZEN v3.6095.01). Fluorescence quantitative PCR reaction was performed by Real time fluorescence quantitative PCR instrument (QTOWER3G, Jena Bioscience) and its application software (qPCRsoft v3.4).

## Data analysis

Statistical analyses were performed using GraphPad Prism 8.0.1 or SPSS 18.0. Western blot quantification was performed using NIH Image J 1.8.0.112. Real-Time PCR results were analyzed by Microsoft Excel (2306 Build 16.0.16529.20164). The fluorescence intensity was quantified with Nikon confocal microscopy system (NIS Elements AR 4.50.00). RNA-seq data was analyzed and visualized using Fastp (version 0.14.1), Microsoft Excel (2306 Build 16.0.16529.20164), Hisat2 (version 2.2.0), circos (version 2.5.0), Stringtie (version 2.1.7), and edgeR (version 4.2.1).

For manuscripts utilizing custom algorithms or software that are central to the research but not yet described in published literature, software must be made available to editors and reviewers. We strongly encourage code deposition in a community repository (e.g. GitHub). See the Nature Portfolio [guidelines for submitting code & software](#) for further information.

## Data

Policy information about [availability of data](#)

All manuscripts must include a [data availability statement](#). This statement should provide the following information, where applicable:

- Accession codes, unique identifiers, or web links for publicly available datasets
- A description of any restrictions on data availability
- For clinical datasets or third party data, please ensure that the statement adheres to our [policy](#)

RNA-Seq data of the present study have been deposited in NCBI Gene Expression Omnibus (GEO) with accession codes GSE182640. Bioinformatics analysis of H3K4me3 modification region was performed at Cistrome Data Browser (<http://cistrome.org/db/#/>). Histone methylation data from work done by Ohba S et al (DOI: 10.1016/j.celrep.2015.06.013). Data of microdissection sample mass spectrometry, SDS-PAGE sample mass spectrometry, oligonucleotides and construct information have been deposited in supplementary tables.

## Research involving human participants, their data, or biological material

Policy information about studies with [human participants or human data](#). See also policy information about [sex, gender \(identity/presentation\), and sexual orientation](#) and [race, ethnicity and racism](#).

|                                                                    |                                                                                                                                                                                                                             |
|--------------------------------------------------------------------|-----------------------------------------------------------------------------------------------------------------------------------------------------------------------------------------------------------------------------|
| Reporting on sex and gender                                        | We report the patient whom cartilage was displayed in the manuscript. We did not do a analysis of sex-specific difference, due to sample size is rather limited.                                                            |
| Reporting on race, ethnicity, or other socially relevant groupings | We did not do a analysis of variable on groupings, due to sample size is rather limited. Human sample was not the main research in our manuscript. In addition, We did not find significant variable in animal experiments. |
| Population characteristics                                         | Our study did not involve the population characteristics.                                                                                                                                                                   |
| Recruitment                                                        | Human healthy articular cartilage specimens from patients with acute trauma were collected from the Department of Pathology of Xijing Hospital.                                                                             |
| Ethics oversight                                                   | Human articular cartilage specimens were collected with an informed consent and approval of the project by the Research Ethics Board of the Xijing Hospital.                                                                |

Note that full information on the approval of the study protocol must also be provided in the manuscript.

## Field-specific reporting

Please select the one below that is the best fit for your research. If you are not sure, read the appropriate sections before making your selection.

Life sciences  Behavioural & social sciences  Ecological, evolutionary & environmental sciences

For a reference copy of the document with all sections, see [nature.com/documents/nr-reporting-summary-flat.pdf](https://nature.com/documents/nr-reporting-summary-flat.pdf)

## Life sciences study design

All studies must disclose on these points even when the disclosure is negative.

|                 |                                                                                                                                                                                                                                                                                                                                                                                                                                                                                                                                                                                                                                                                                                                                                                                                                                                                                                                   |
|-----------------|-------------------------------------------------------------------------------------------------------------------------------------------------------------------------------------------------------------------------------------------------------------------------------------------------------------------------------------------------------------------------------------------------------------------------------------------------------------------------------------------------------------------------------------------------------------------------------------------------------------------------------------------------------------------------------------------------------------------------------------------------------------------------------------------------------------------------------------------------------------------------------------------------------------------|
| Sample size     | No statistical methods were used to predetermine sample size, which were chosen based on previous experiments and comparable studies in literature (PMID: 30651640, PMID: 32807933, PMID: 34163069 ). For key experiments, several test runs were performed to determine the suitable sample size. The sample sizes we chose are sufficient and suitable based on the following ingredients: 1. Effect size: the great difference in outcome measure between control and experimental groups (more than two-fold). 2. Variability: no considerable overlap in outcome measure between control and experimental groups. 3. Significance level : the statistical test Student's t-test and ANOVA with post-test used finds that the probability of the result is even lower than the chance of a type 1 error), indicating that the hypothesis is true. Sample size for each experiment is indicated in the legend. |
| Data exclusions | No exclusions other than caused by missing information have been made.                                                                                                                                                                                                                                                                                                                                                                                                                                                                                                                                                                                                                                                                                                                                                                                                                                            |
| Replication     | At least three biological replicates were performed for all in vivo experiments, most in vitro experiments were repeated at least three times. For non-quantitative data (micrographs, western blots and so on), findings were reproduced at least three times by replicating the                                                                                                                                                                                                                                                                                                                                                                                                                                                                                                                                                                                                                                 |

experiments and/or cross-validating with orthogonal approaches, and representative results are shown. Details of each exact number of replicates are provided in the figure legends.

## Randomization

No statistical methods were used for randomization.  
For in vitro experiments, cells were isolated from randomly chosen wild-type or knockout mice.  
For in vivo experiments, mice were randomly allocated into experimental groups.

## Blinding

Blinding was widely used in the study. Data collection and analysis, such as immunostaining, qRT-PCR, and Western blot were frequently performed by participants other than the experiment designer. During these data collection and analysis steps, all participants were routinely blinded to group allocation.

## Reporting for specific materials, systems and methods

We require information from authors about some types of materials, experimental systems and methods used in many studies. Here, indicate whether each material, system or method listed is relevant to your study. If you are not sure if a list item applies to your research, read the appropriate section before selecting a response.

### Materials & experimental systems

### Methods

| n/a                                 | Involved in the study                                           |
|-------------------------------------|-----------------------------------------------------------------|
| <input type="checkbox"/>            | <input checked="" type="checkbox"/> Antibodies                  |
| <input type="checkbox"/>            | <input checked="" type="checkbox"/> Eukaryotic cell lines       |
| <input checked="" type="checkbox"/> | <input type="checkbox"/> Palaeontology and archaeology          |
| <input type="checkbox"/>            | <input checked="" type="checkbox"/> Animals and other organisms |
| <input checked="" type="checkbox"/> | <input type="checkbox"/> Clinical data                          |
| <input checked="" type="checkbox"/> | <input type="checkbox"/> Dual use research of concern           |
| <input checked="" type="checkbox"/> | <input type="checkbox"/> Plants                                 |

| n/a                                 | Involved in the study                              |
|-------------------------------------|----------------------------------------------------|
| <input checked="" type="checkbox"/> | <input type="checkbox"/> ChIP-seq                  |
| <input type="checkbox"/>            | <input checked="" type="checkbox"/> Flow cytometry |
| <input checked="" type="checkbox"/> | <input type="checkbox"/> MRI-based neuroimaging    |

## Antibodies

### Antibodies used

#### Primary antibodies:

Epitope, Host Species , Concentration used, Manufacturer, Clone/Polyclonal, Catalog Number  
 Hif1a, Rabbit, Western Blotting 1:1000/Immunofluorescence 1:400, CST, D1S7W, 36169  
 Hbb, Rabbit, Western Blotting 1:1000/Immunofluorescence 1:400, Invitrogen, Polyclonal, PA5-60287  
 GFP, Rabbit, Western Blotting 1:1000, CST, Polyclonal, 2555  
 GFP, Rabbit, Electron Microscopy 1:100, Abcam, Polyclonal, ab290  
 Hba, Rabbit, Western Blotting 1:1000/Immunofluorescence 1:200, Invitrogen, SN70-09, MA5-32328  
 Hif2 $\alpha$ /Epas1, Rabbit, Rabbit, Western Blotting 1:1000, Novus, polyclonal, NB100-12  
 Klf1/Eklf, Rabbit, Western Blotting 1:1000, Abnova, polyclonal, PAB5895  
 Klf1/Eklf, Mouse, ChIP-qPCR 5ug/ml, Active motif, 7B2, 61233  
 AMPK $\alpha$ 1, Rabbit, Western Blotting 1:500, ABclonal, polyclonal, A1229  
 pAMPK, Rabbit, Western Blotting 1:500, ABclonal, ARC1547, AP1002  
 Caspase 3, Rabbit, Western Blotting 1:500/Immunofluorescence 1:200, ABclonal, ARC0133, A19654  
 Kdm5a, Rabbit, Western Blotting 1:500, ABclonal, ARC1120, A4755  
 Kdm5b, Rabbit, Western Blotting 1:500, ABclonal, polyclonal, A7772  
 H3K4me3, Rabbit, Chip-qPCR 5ug/ml, ABclonal, polyclonal, A2375  
 H3, Rabbit, chip-qPCR 5ug/ml, Proteintech, polyclonal, 17168-1-AP  
 Nonspecific IgG, rabbit, Chip-qPCR 5ug/ml, Proteintech, polyclonal, 30000-0-AP  
 $\alpha$ -Tubulin, rabbit, Western Blotting 1:3000, CST, p11H10, 2125

#### secondary antibodies

Epitope, Host Species , Concentration used, Manufacturer, Clone/Polyclonal, Catalog Number  
 Anti-Rabbit IgG (whole molecule)–Peroxidase antibody produced in goat, goat, 1:10000, Millipore, polyclonal, A0545  
 Anti-Mouse IgG (Fab specific) antibody produced in goat, goat, 1:10000, Millipore, polyclonal, M4155  
 Horseradish peroxidase enzyme (HRP)-coupled goat anti-rabbit secondary antibody, goat, 1:500, Abcam, polyclonal, ab7090

### Validation

All antibodies were obtained from indicated commercial vendors with ensured quality. In addition, all the antibodies have been used in multiple experiments to detect intended proteins in control samples with expected molecular weight to validate their effectiveness in our study. Antibodies target for GFP were validated Specific affinity for EGFP in multiple literatures.

#### Primary antibodies:

Hif-1 $\alpha$ , Reactivity: H, M, Mk. Application: WB IP, IF, F, ChIP, C&R. ([https://www.cellsignal.cn/products/primary-antibodies/hif-1a-d1s7w-xp-rabbit-mab/36169?site-search-type=Products&N=4294956287&Ntt=36169&fromPage=plp&\\_requestid=5968605](https://www.cellsignal.cn/products/primary-antibodies/hif-1a-d1s7w-xp-rabbit-mab/36169?site-search-type=Products&N=4294956287&Ntt=36169&fromPage=plp&_requestid=5968605))  
 Hbb, Reactivity: H, highest antigen sequence identity to the following orthologs: Mouse-96%, Rat-96%. Application: IHC ; ICC/IF. (<https://www.thermofisher.cn/cn/zh/antibody/product/HBB-Antibody-Polyclonal/PA5-60287>)  
 GFP, Reactivity: species independent. Application: WB; IHC. ([https://www.cellsignal.cn/products/primary-antibodies/gfp-antibody/2555?site-search-type=Products&N=4294956287&Ntt=2555&fromPage=plp&\\_requestid=5969550](https://www.cellsignal.cn/products/primary-antibodies/gfp-antibody/2555?site-search-type=Products&N=4294956287&Ntt=2555&fromPage=plp&_requestid=5969550))  
 GFP, Reactivity: species independent. Application: WB; IHC; Electron Microscopy. (<https://www.abcam.cn/products/primary-antibodies/gfp-antibody-ab290.html>)

Hba Reactivity: H, M, Rat. Application: Western Blot (WB) ; IHC. (<https://www.thermofisher.cn/cn/zh/antibody/product/Hemoglobin-alpha-Antibody-clone-SN70-09-Recombinant-Monoclonal/MA5-32328>)

Hif-2a/Epas1, Reactivity: H, M, Rat, Fi, Ha, Pm, Rb, Re, Sh. Application: Chip; IHC; ELISA ; WB. ([https://www.novusbio.com/products/hif-2-alpha-epas1-antibody\\_nb100-122](https://www.novusbio.com/products/hif-2-alpha-epas1-antibody_nb100-122))

Klf1/Eklf, Reactivity: M. Application: WB; .([https://www.abnova.com/products/products\\_detail.asp?catalog\\_id=PAB5895](https://www.abnova.com/products/products_detail.asp?catalog_id=PAB5895))

Klf1/Eklf, Reactivity: M. Application: chip-qPCR; (<https://www.activemotif.com.cn/catalog/details/61233/eklf-antibody-mab-clone-7b2>)

AMPK $\alpha$ 1, Reactivity: H, M, Rat. Application: WB ; IF/ICC. (<https://abclonal.com.cn/catalog/A1229>)

p-AMPK, Reactivity: H, M. Application: WB. (<https://abclonal.com.cn/catalog/AP1002>)

Caspase3, Reactivity: H, M, Rat. Application: WB; IF/ICC. (<https://abclonal.com.cn/catalog/A19654>)

Kdm5a, Reactivity: H, M, Rat. Application: WB; IP; ChIP. (<https://abclonal.com.cn/catalog/A4755>)

Kdm5b, Reactivity: H, M. Application: WB; IF/ICC. (<https://abclonal.com.cn/catalog/A7772>)

H3K4me3, Reactivity: H, M, Rat. Application: WB; IF/ICC. (<https://abclonal.com.cn/catalog/A2375>)

H3, Rabbit, Reactivity: H, M, Rat. Application: FC, IF, IHC, IP, WB, ELISA. (<https://www.ptgcn.com/products/Histone-H3-Antibody-17168-1-AP.htm>)

Nonspecific IgG, Reactivity: H, M, Rat. Application: FC, IF, IHC, IP, WB, ELISA. (<https://www.ptgcn.com/products/IgG-control-Antibody-30000-0-AP.htm>)

$\alpha$ -Tubulin, Reactivity: H, M, Rat, Mk, Dm, Z, B, Pg. Application: IF, IHC, IP, WB. ([https://www.cellsignal.cn/products/primary-antibodies/a-tubulin-11h10-rabbit-mab/2125?site-search-type=Products&N=4294956287&Ntt=2125&fromPage=plp&\\_requestid=5981232](https://www.cellsignal.cn/products/primary-antibodies/a-tubulin-11h10-rabbit-mab/2125?site-search-type=Products&N=4294956287&Ntt=2125&fromPage=plp&_requestid=5981232))

secondary antibodies

Anti-Rabbit IgG (whole molecule)–Peroxidase antibody produced in goat, Reactivity: R. Application: IF, IHC, WB. (<https://www.sigmaaldrich.cn/CN/en/product/sigma/a0545>)

Anti-Mouse IgG (Fab specific) antibody produced in goat, Reactivity: M. , Application: IF, IHC, WB. (<https://www.sigmaaldrich.cn/CN/en/product/sigma/m4155>)

Horseradish peroxidase enzyme (HRP)-coupled goat anti-rabbit secondary antibody, Reactivity: R. Application: ICC/IF, IHC-P, WB, ELISA, Immunomicroscopy, Dot blot, IHC-Fr. (<https://www.abcam.cn/products/secondary-antibodies/goat-rabbit-igg-hl-hrp-preadsorbed-ab7090.html>)

## Eukaryotic cell lines

Policy information about [cell lines and Sex and Gender in Research](#)

|                                                                   |                                                                                                                                                                                                         |
|-------------------------------------------------------------------|---------------------------------------------------------------------------------------------------------------------------------------------------------------------------------------------------------|
| Cell line source(s)                                               | 293T, HepG2, HCT116, PLC/PR/F5, PC12 cell lines were purchased from Procell Life Science&Technology Co.,Ltd. ATDC5 cell line was purchased from NingboMingZhoubioCO.,Ltd, which was derived from ECACC. |
| Authentication                                                    | All cell lines were authenticated by STR profiling.                                                                                                                                                     |
| Mycoplasma contamination                                          | All cell lines were mycoplasma-free after PCR verification.                                                                                                                                             |
| Commonly misidentified lines (See <a href="#">ICLAC</a> register) | There is no commonly misidentified cell line were used in the study.                                                                                                                                    |

## Animals and other research organisms

Policy information about [studies involving animals](#); [ARRIVE guidelines](#) recommended for reporting animal research, and [Sex and Gender in Research](#)

|                    |                                                                                                                                                                                                                                                                                                                                                                                                                                                                                                                                                                                                                                                                                                                                                                                                                                                                                                                                                                                                                                                                                                                                                                                                                                                                                                                                                                                                                                                                                                                                                                                                                                                                                                                                                                                                                                                                                                                                                                                                                                                                                                              |
|--------------------|--------------------------------------------------------------------------------------------------------------------------------------------------------------------------------------------------------------------------------------------------------------------------------------------------------------------------------------------------------------------------------------------------------------------------------------------------------------------------------------------------------------------------------------------------------------------------------------------------------------------------------------------------------------------------------------------------------------------------------------------------------------------------------------------------------------------------------------------------------------------------------------------------------------------------------------------------------------------------------------------------------------------------------------------------------------------------------------------------------------------------------------------------------------------------------------------------------------------------------------------------------------------------------------------------------------------------------------------------------------------------------------------------------------------------------------------------------------------------------------------------------------------------------------------------------------------------------------------------------------------------------------------------------------------------------------------------------------------------------------------------------------------------------------------------------------------------------------------------------------------------------------------------------------------------------------------------------------------------------------------------------------------------------------------------------------------------------------------------------------|
| Laboratory animals | <p>Mice heterozygous for the alpha-globin null allele (Hba+/-, both of the adult hemoglobin genes, alpha 1 and alpha 2, and the region between them were deleted and replaced with a neomycin resistance cassette by homologous recombination) or for the beta-globin null allele (Hbb+/-, a genomic fragment encompassing all of Hbb-b1 and a 5' portion of Hbb-b2 was replaced with a neo cassette inserted by homologous recombination.) were produced by crossing mice of Hbatm1Paz Hbbtm1Tow Tg (HBA-HBBs) 41Paz/J (Jackson Labs, No:003342)46 with wildtype C57BL/6J mice. The Hbatm1Paz Hbbtm1Tow Tg (HBA-HBBs) 41Paz/J mice are called sickle cell mice (Berkeley model), which are homozygous for the both alpha-globin and beta-globin null allele and carrying the human sickle transgene (Hba0/0 Hbb0/0Tg (Hu-miniLCR<math>\alpha</math>1GyAy<math>\delta</math><math>\beta</math>S). Mice homozygous for Hba or Hbb knock-out mutation die in utero for severe anemia. Hif-1<math>\alpha</math>F/F (No.007561)47, Col2a1-CreERT2 (No.006774)48, Prx1-Cre (No.005584)49 mice were from Jackson Labs. Hif-2<math>\alpha</math>F/F (No.NM-CKO-200163) mice were from Shanghai Model Organisms Center, Inc. To specifically knockout Hif-1<math>\alpha</math> or/and Hif-2<math>\alpha</math> gene in chondrocytes, Hif-1<math>\alpha</math>F/F or/and Hif-2<math>\alpha</math>F/F mice were bred to Col2a1-CreERT2 mice. To conditionally delete Hbb in mesenchymal cells or chondrocytes, HbbF/F mice were bred to Prx1-Cre or Col2a1-CreERT2 mice. To investigate the role of Klf1 in chondrocytes, we generated conditional Klf1-floxed mice with C57BL/6J-background by homologous recombination. A targeting vector was designed to replace the 2nd exon of Klf1 (Sup. Fig. 3a). To conditionally delete Klf1 in chondrocytes, Klf1F/F mice were bred to Col2a1-CreERT2.</p> <p>Studies were conducted on E14.5 to 12 month old mus musculus of the C57BL/6 Strain.</p> <p>Mice were housed in a room on a 12:12 light:dark cycle, a 72+/-2 F temperature setting and humidity of 30-70%.</p> |
| Wild animals       | There is no wild animal in our study.                                                                                                                                                                                                                                                                                                                                                                                                                                                                                                                                                                                                                                                                                                                                                                                                                                                                                                                                                                                                                                                                                                                                                                                                                                                                                                                                                                                                                                                                                                                                                                                                                                                                                                                                                                                                                                                                                                                                                                                                                                                                        |
| Reporting on sex   | Sex-based analyses were not performed, due to no obvious sex and gender difference was observed in our study.                                                                                                                                                                                                                                                                                                                                                                                                                                                                                                                                                                                                                                                                                                                                                                                                                                                                                                                                                                                                                                                                                                                                                                                                                                                                                                                                                                                                                                                                                                                                                                                                                                                                                                                                                                                                                                                                                                                                                                                                |

Field-collected samples

Ethics oversight

Note that full information on the approval of the study protocol must also be provided in the manuscript.

## Flow Cytometry

### Plots

Confirm that:

- The axis labels state the marker and fluorochrome used (e.g. CD4-FITC).
- The axis scales are clearly visible. Include numbers along axes only for bottom left plot of group (a 'group' is an analysis of identical markers).
- All plots are contour plots with outliers or pseudocolor plots.
- A numerical value for number of cells or percentage (with statistics) is provided.

### Methodology

Sample preparation

Instrument

Software

Cell population abundance

Gating strategy

- Tick this box to confirm that a figure exemplifying the gating strategy is provided in the Supplementary Information.
